# Supplementary material
Source: PubMed Central journal article supplement (PMC5525141)
Supplement: NIHMS875838-supplement-Supplementary_Material.pdf [file NIHMS875838-supplement-Supplementary_Material.pdf]

# Variable Selection for Health Care Demand in Germany

Zhu Wang  
Connecticut Children's Medical Center  
University of Connecticut School of Medicine  
zwang@connecticutchildrens.org

February 26, 2015

This document reproduces the data analysis presented in Wang et al. (2015). For a description of the theory behind application illustrated here we refer to the original manuscript.

Riphahn et al. (2003) utilized a part of the German Socioeconomic Panel (GSOEP) data set to analyze the number of doctor visits. The original data have twelve annual waves from 1984 to 1995 for a representative sample of German households, which provide broad information on the health care utilization, current employment status, and the insurance arrangements under which subjects are protected. The data set contains number of doctor office visits for 1,812 West German men aged 25 to 65 years in the last three months of 1994. As shown in the figure, many doctor office visits are zeros, which can be difficult to fit with a Poisson or negative binomial model. Therefore, zero-inflated negative binomial (ZINB) model is considered.

```
R> library("mpath")
R> library("zic")
R> library("pscl")
R> data(docvisits)

R> barplot(with(docvisits, table(docvisits)), ylab = "Frequency",
           xlab = "Doctor office visits")
```

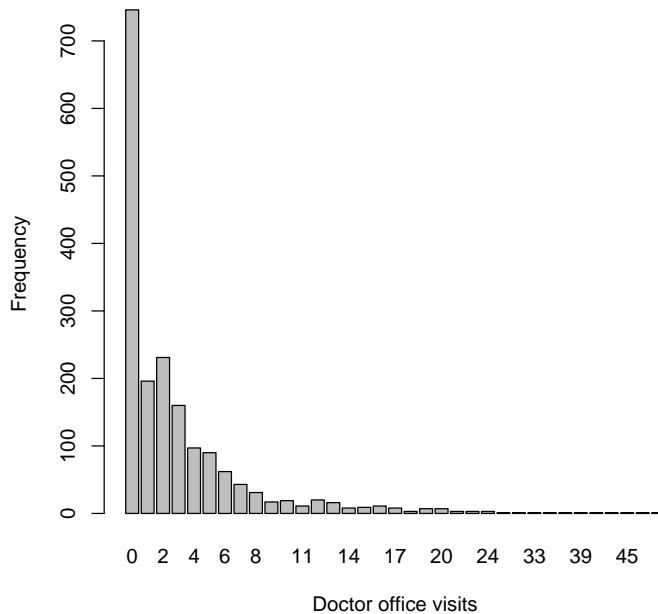

We include the linear spline variables *age30* to *age60* and their interaction terms with the health satisfaction *health*.

```
R> dt <- docvisits[, -(2:3)]
R> tmp <- model.matrix(~age30 * health + age35 * health +
  age40 * health + age45 * health + age50 * health +
  age55 * health + age60 * health, data = dt)[, -(1:9)]
R> dat <- cbind(dt, tmp)
```

Full ZINB model with all predictor variables.

```
R> m1 <- zeroinfl(docvisits ~ . | ., data = dat, dist = "negbin")
R> summary(m1)
```

Call:

```
zeroinfl(formula = docvisits ~ . | ., data = dat, dist = "negbin")
```

Pearson residuals:

| Min    | 1Q     | Median | 3Q    | Max   |
|--------|--------|--------|-------|-------|
| -1.073 | -0.660 | -0.394 | 0.301 | 9.910 |

Count model coefficients (negbin with log link):

|             | Estimate | Std. Error | z value | Pr(> z )  |
|-------------|----------|------------|---------|-----------|
| (Intercept) | 2.41222  | 0.34563    | 6.98    | 3e-12 *** |
| health      | -0.16382 | 0.03449    | -4.75   | 2e-06 *** |
| handicap    | 0.26691  | 0.19452    | 1.37    | 0.17001   |
| hdegree     | -0.00201 | 0.00329    | -0.61   | 0.54180   |
| married     | -0.14720 | 0.09284    | -1.59   | 0.11282   |

|                    |          |         |       |             |
|--------------------|----------|---------|-------|-------------|
| schooling          | -0.00458 | 0.01539 | -0.30 | 0.76616     |
| hhincome           | 0.00441  | 0.01616 | 0.27  | 0.78504     |
| children           | 0.01741  | 0.08841 | 0.20  | 0.84385     |
| self               | -0.35994 | 0.15389 | -2.34 | 0.01934 *   |
| civil              | -0.26809 | 0.16062 | -1.67 | 0.09511 .   |
| bluec              | 0.10345  | 0.08615 | 1.20  | 0.22983     |
| employed           | -0.09392 | 0.10723 | -0.88 | 0.38110     |
| public             | -0.01141 | 0.13959 | -0.08 | 0.93487     |
| addon              | 0.36473  | 0.23249 | 1.57  | 0.11670     |
| age30TRUE          | 0.09414  | 0.36278 | 0.26  | 0.79525     |
| age35TRUE          | -0.25482 | 0.36728 | -0.69 | 0.48780     |
| age40TRUE          | 0.05154  | 0.39890 | 0.13  | 0.89720     |
| age45TRUE          | 0.72053  | 0.38568 | 1.87  | 0.06173 .   |
| age50TRUE          | 0.20245  | 0.34105 | 0.59  | 0.55278     |
| age55TRUE          | -0.51587 | 0.30727 | -1.68 | 0.09318 .   |
| age60TRUE          | 0.40081  | 0.31340 | 1.28  | 0.20093     |
| `age30TRUE:health` | -0.01175 | 0.05206 | -0.23 | 0.82146     |
| `health:age35TRUE` | 0.04319  | 0.05427 | 0.80  | 0.42605     |
| `health:age40TRUE` | -0.01669 | 0.06167 | -0.27 | 0.78664     |
| `health:age45TRUE` | -0.10124 | 0.06145 | -1.65 | 0.09946 .   |
| `health:age50TRUE` | -0.02410 | 0.05336 | -0.45 | 0.65150     |
| `health:age55TRUE` | 0.13292  | 0.05166 | 2.57  | 0.01008 *   |
| `health:age60TRUE` | -0.09509 | 0.05593 | -1.70 | 0.08909 .   |
| Log(theta)         | 0.32239  | 0.09046 | 3.56  | 0.00037 *** |

Zero-inflation model coefficients (binomial with logit link):

|                    | Estimate | Std. Error | z value | Pr(> z ) |
|--------------------|----------|------------|---------|----------|
| (Intercept)        | -2.31059 | 0.97764    | -2.36   | 0.018 *  |
| health             | 0.22741  | 0.09983    | 2.28    | 0.023 *  |
| handicap           | -0.33423 | 0.75516    | -0.44   | 0.658    |
| hdegree            | -0.00243 | 0.01562    | -0.16   | 0.876    |
| married            | -0.40373 | 0.24700    | -1.63   | 0.102    |
| schooling          | 0.01852  | 0.03825    | 0.48    | 0.628    |
| hhincome           | -0.03842 | 0.04432    | -0.87   | 0.386    |
| children           | 0.50569  | 0.23533    | 2.15    | 0.032 *  |
| self               | -0.24892 | 0.47771    | -0.52   | 0.602    |
| civil              | 0.02095  | 0.38325    | 0.05    | 0.956    |
| bluec              | 0.02283  | 0.22215    | 0.10    | 0.918    |
| employed           | -0.08448 | 0.29703    | -0.28   | 0.776    |
| public             | -0.23043 | 0.33817    | -0.68   | 0.496    |
| addon              | 0.29983  | 0.52438    | 0.57    | 0.567    |
| age30TRUE          | -1.67862 | 1.32598    | -1.27   | 0.206    |
| age35TRUE          | 0.90000  | 1.44345    | 0.62    | 0.533    |
| age40TRUE          | -0.64989 | 1.44217    | -0.45   | 0.652    |
| age45TRUE          | 2.99929  | 1.20006    | 2.50    | 0.012 *  |
| age50TRUE          | -2.95569 | 1.70089    | -1.74   | 0.082 .  |
| age55TRUE          | 0.33612  | 1.80886    | 0.19    | 0.853    |
| age60TRUE          | -2.33629 | 2.68475    | -0.87   | 0.384    |
| `age30TRUE:health` | 0.22794  | 0.16279    | 1.40    | 0.161    |
| `health:age35TRUE` | -0.11043 | 0.18081    | -0.61   | 0.541    |

```

`health:age40TRUE` 0.11569 0.18628 0.62 0.535
`health:age45TRUE` -0.40960 0.16390 -2.50 0.012 *
`health:age50TRUE` 0.25083 0.22087 1.14 0.256
`health:age55TRUE` 0.10792 0.23375 0.46 0.644
`health:age60TRUE` 0.19599 0.33942 0.58 0.564
---
Signif. codes: 0 '***' 0.001 '**' 0.01 '*' 0.05 '.' 0.1 ' ' 1

Theta = 1.38
Number of iterations in BFGS optimization: 63
Log-likelihood: -3.63e+03 on 57 Df

R> cat("loglik of zero-inflated model", logLik(m1))

loglik of zero-inflated model -3626

R> cat("BIC of zero-inflated model", AIC(m1, k = log(dim(dat)[1])))

BIC of zero-inflated model 7679

R> cat("AIC of zero-inflated model", AIC(m1))

AIC of zero-inflated model 7366

Backward stepwise variable selection with significance level alpha=0.01.

R> fitbe <- be.zeroinfl(m1, data = dat, dist = "negbin",
  alpha = 0.01, trace = FALSE)
R> summary(fitbe)

Call:
zeroinfl(formula = eval(parse(text = out)), data = data, dist = dist)

Pearson residuals:
      Min      1Q  Median      3Q      Max
-1.020 -0.646 -0.394  0.296  8.665

Count model coefficients (negbin with log link):
              Estimate Std. Error z value Pr(>|z|)
(Intercept)  2.5662     0.0955  26.86 < 2e-16 ***
health      -0.2013     0.0143 -14.12 < 2e-16 ***
handicap     0.3031     0.0849   3.57 0.00036 ***
self        -0.3663     0.1178  -3.11 0.00187 **
civil       -0.3372     0.1043  -3.23 0.00123 **
Log(theta)   0.2360     0.0898   2.63 0.00858 **

Zero-inflation model coefficients (binomial with logit link):
              Estimate Std. Error z value Pr(>|z|)
(Intercept) -2.9838     0.3722  -8.02 1.1e-15 ***
health       0.3010     0.0461   6.53 6.4e-11 ***
age50TRUE   -1.0004     0.2602  -3.84 0.00012 ***
---

```

Signif. codes: 0 '\*\*\*' 0.001 '\*\*' 0.01 '\*' 0.05 '.' 0.1 ' ' 1

Theta = 1.266

Number of iterations in BFGS optimization: 17

Log-likelihood: -3.66e+03 on 9 Df

```
R> cat("loglik of zero-inflated model with backward selection",
      logLik(fitbe))
```

loglik of zero-inflated model with backward selection -3656

```
R> cat("BIC of zero-inflated model with backward selection",
      AIC(fitbe, k = log(dim(dat)[1])))
```

BIC of zero-inflated model with backward selection 7380

Compute LASSO estimates.

```
R> fit.lasso <- zipath(docvisits ~ . | ., data = dat, family = "negbin",
  nlambda = 100, lambda.zero.min.ratio = 0.001, maxit.em = 300,
  maxit.theta = 25, theta.fixed = FALSE, trace = FALSE,
  penalty = "enet", rescale = FALSE)
```

Estimated coefficient parameters with smallest BIC value.

```
R> minBic <- which.min(BIC(fit.lasso))
```

```
R> coef(fit.lasso, minBic)
```

\$count

| (Intercept)        | health             | handicap           |
|--------------------|--------------------|--------------------|
| 2.30562            | -0.17366           | 0.15512            |
| hdegree            | married            | schooling          |
| 0.00000            | 0.00000            | 0.00000            |
| hhincome           | children           | self               |
| 0.00000            | 0.00000            | 0.00000            |
| civil              | bluec              | employed           |
| 0.00000            | 0.00000            | 0.00000            |
| public             | addon              | age30TRUE          |
| 0.05665            | 0.00000            | 0.00000            |
| age35TRUE          | age40TRUE          | age45TRUE          |
| 0.00000            | 0.00000            | 0.00000            |
| age50TRUE          | age55TRUE          | age60TRUE          |
| 0.03790            | 0.09881            | 0.00000            |
| `age30TRUE:health` | `health:age35TRUE` | `health:age40TRUE` |
| 0.00000            | 0.00000            | 0.00000            |
| `health:age45TRUE` | `health:age50TRUE` | `health:age55TRUE` |
| 0.00000            | 0.00000            | 0.00000            |
| `health:age60TRUE` |                    |                    |
| 0.00000            |                    |                    |

\$zero

| (Intercept) | health | handicap |
|-------------|--------|----------|
|-------------|--------|----------|

```

-2.6970          0.2521          0.0000
hdegree         married         schooling
0.0000          0.0000          0.0000
hhincome        children        self
0.0000          0.1951          0.0000
civil           bluec           employed
0.0000          0.0000          0.0000
public          addon           age30TRUE
0.0000          0.0000          0.0000
age35TRUE      age40TRUE      age45TRUE
0.0000          0.0000          0.0000
age50TRUE      age55TRUE      age60TRUE
-0.3978        0.0000          0.0000
`age30TRUE:health` `health:age35TRUE` `health:age40TRUE`
0.0000          0.0000          0.0000
`health:age45TRUE` `health:age50TRUE` `health:age55TRUE`
0.0000          0.0000          0.0000
`health:age60TRUE`
0.0000

```

```
R> cat("theta estimate", fit.lasso$theta[minBic])
```

```
theta estimate 1.368
```

Compute standard errors of coefficients and theta (the last one for theta).

```
R> se(fit.lasso, minBic, log = FALSE)
```

```
[1] 0.15053 0.01800 0.10393 0.09110 0.10278 0.11073 0.28648 0.03498
[9] 0.15419 0.18298 0.12955
```

Compute AIC, BIC, log-likelihood values of the selected model.

```
R> AIC(fit.lasso)[minBic]
```

```
0.048
7351
```

```
R> BIC(fit.lasso)[minBic]
```

```
0.048
7412
```

```
R> logLik(fit.lasso)[minBic]
```

```
[1] -3665
```

Compute log-likelihood value via 10-fold cross-validation.

```
R> n <- dim(dat)[1]
```

```
R> K <- 10
```

```
R> set.seed(197)
```

```
R> foldid <- split(sample(1:n), rep(1:K, length = n))
```

```
R> fitcv <- cv.zipath(docvisits ~ . | ., data = dat, family = "negbin",
  nlambda = 100, lambda.count = fit.lasso$lambda.count[1:30],
  lambda.zero = fit.lasso$lambda.zero[1:30], maxit.em = 300,
  maxit.theta = 1, theta.fixed = FALSE, trace = FALSE,
  penalty = "enet", rescale = FALSE, foldid = foldid)
R> cat("cross-validated loglik", max(fitcv$cv))
```

cross-validated loglik -367.8

Compute MCP estimates. We compute solution paths for the first 30 pairs of shrinkage parameters (the EM algorithm can be slow), and then evaluate results as for the LASSO estimates. For cross-validation, set maximum number of iterations in estimating scaling parameter 1 (maxit.theta=1) to reduce computation costs.

```
R> tmp <- zipath(docvisits ~ . | ., data = dat, family = "negbin",
  gamma.count = 2.7, gamma.zero = 2.7, lambda.zero.min.ratio = 0.1,
  maxit = 1, maxit.em = 1, maxit.theta = 2, theta.fixed = FALSE,
  penalty = "mnet")
R> fit.mcp <- zipath(docvisits ~ . | ., data = dat, family = "negbin",
  gamma.count = 2.7, gamma.zero = 2.7, lambda.count = tmp$lambda.count[1:30],
  lambda.zero = tmp$lambda.zero[1:30], maxit.em = 300,
  maxit.theta = 25, theta.fixed = FALSE, penalty = "mnet")
```

Estimated coefficient parameters with smallest BIC value.

```
R> minBic <- which.min(BIC(fit.mcp))
R> coef(fit.mcp, minBic)
```

```
$count
      (Intercept)      health      handicap
      2.4867      -0.1955      0.2264
      hdegree      married      schooling
      0.0000      0.0000      0.0000
      hhincome      children      self
      0.0000      0.0000      -0.3697
      civil      bluec      employed
      -0.3318      0.0000      0.0000
      public      addon      age30TRUE
      0.0000      0.0000      0.0000
      age35TRUE      age40TRUE      age45TRUE
      0.0000      0.0000      0.0000
      age50TRUE      age55TRUE      age60TRUE
      0.0000      0.2140      0.0000
`age30TRUE:health` `health:age35TRUE` `health:age40TRUE`
      0.0000      0.0000      0.0000
`health:age45TRUE` `health:age50TRUE` `health:age55TRUE`
      0.0000      0.0000      0.0000
`health:age60TRUE`
      0.0000

$zero
```

```

(Intercept)          health          handicap
-3.3523             0.3162             0.0000
hdegree             married          schooling
0.0000              0.0000             0.0000
hhincome            children          self
0.0000              0.4335             0.0000
civil               bluec             employed
0.0000              0.0000             0.0000
public              addon            age30TRUE
0.0000              0.0000             0.0000
age35TRUE           age40TRUE          age45TRUE
0.0000              0.0000             0.0000
age50TRUE           age55TRUE          age60TRUE
-0.6748             0.0000             0.0000
`age30TRUE:health` `health:age35TRUE` `health:age40TRUE`
0.0000              0.0000             0.0000
`health:age45TRUE` `health:age50TRUE` `health:age55TRUE`
0.0000              0.0000             0.0000
`health:age60TRUE`
0.0000

```

```
R> cat("theta estimate", fit.mcp$theta[minBic])
```

```
theta estimate 1.274
```

Compute standard errors of coefficients and theta (the last one for theta).

```
R> se(fit.mcp, minBic, log = FALSE)
```

```
[1] 0.12484 0.01816 0.10383 0.12201 0.11888 0.08569 0.40886 0.04506
[9] 0.17770 0.25235 0.13355
```

Compute AIC, BIC, log-likelihood values of the selected model.

```
R> AIC(fit.mcp)[minBic]
```

```
0.025
7320
```

```
R> BIC(fit.mcp)[minBic]
```

```
0.025
7380
```

```
R> logLik(fit.mcp)[minBic]
```

```
[1] -3649
```

Compute log-likelihood value via 10-fold cross-validation.

```
R> fitcv <- cv.zipath(docvisits ~ . | ., data = dat, family = "negbin",
  gamma.count = 2.7, gamma.zero = 2.7, lambda.count = tmp$lambda.count[1:30],
  lambda.zero = tmp$lambda.zero[1:30], maxit.em = 300,
  maxit.theta = 1, theta.fixed = FALSE, trace = FALSE,
  penalty = "mnet", rescale = FALSE, foldid = foldid)
R> cat("cross-validated loglik", max(fitcv$cv))
```



cross-validated loglik -367.8

Compute SCAD estimates.

```
R> tmp <- zipath(docvisits ~ . | ., data = dat, family = "negbin",
  gamma.count = 2.5, gamma.zero = 2.5, lambda.zero.min.ratio = 0.01,
  maxit = 1, maxit.em = 1, maxit.theta = 2, theta.fixed = FALSE,
  penalty = "snet")
R> fit.scad <- zipath(docvisits ~ . | ., data = dat, family = "negbin",
  gamma.count = 2.5, gamma.zero = 2.5, lambda.count = tmp$lambda.count[1:30],
  lambda.zero = tmp$lambda.zero[1:30], maxit.em = 300,
  maxit.theta = 25, theta.fixed = FALSE, penalty = "snet")
```

Estimated coefficient parameters with smallest BIC value.

```
R> minBic <- which.min(BIC(fit.scad))
R> coef(fit.scad, minBic)
```

\$count

|                    |                    |                    |
|--------------------|--------------------|--------------------|
| (Intercept)        | health             | handicap           |
| 2.0961             | -0.1902            | 0.2568             |
| hdegree            | married            | schooling          |
| 0.0000             | 0.0000             | 0.0000             |
| hhincome           | children           | self               |
| 0.0000             | 0.0000             | 0.0000             |
| civil              | bluec              | employed           |
| 0.0000             | 0.0000             | 0.0000             |
| public             | addon              | age30TRUE          |
| 0.3070             | 0.0000             | 0.0000             |
| age35TRUE          | age40TRUE          | age45TRUE          |
| 0.0000             | 0.0000             | 0.0000             |
| age50TRUE          | age55TRUE          | age60TRUE          |
| 0.2184             | 0.0000             | 0.0000             |
| `health:age30TRUE` | `health:age35TRUE` | `health:age40TRUE` |
| 0.0000             | 0.0000             | 0.0000             |
| `health:age45TRUE` | `health:age50TRUE` | `health:age55TRUE` |
| 0.0000             | 0.0000             | 0.0000             |
| `health:age60TRUE` |                    |                    |
| 0.0000             |                    |                    |

\$zero

|             |          |           |
|-------------|----------|-----------|
| (Intercept) | health   | handicap  |
| -3.6207     | 0.3400   | 0.0000    |
| hdegree     | married  | schooling |
| 0.0000      | 0.0000   | 0.0000    |
| hhincome    | children | self      |
| 0.0000      | 0.5239   | 0.0000    |
| civil       | bluec    | employed  |
| 0.0000      | 0.0000   | 0.0000    |
| public      | addon    | age30TRUE |
| 0.0000      | 0.0000   | 0.0000    |

```

age35TRUE      age40TRUE      age45TRUE
0.0000         0.0000         -0.3322
age50TRUE      age55TRUE      age60TRUE
0.0000         0.0000         0.0000
`age30TRUE:health` `health:age35TRUE` `health:age40TRUE`
0.0000         0.0000         0.0000
`health:age45TRUE` `health:age50TRUE` `health:age55TRUE`
0.0000         0.0000         0.0000
`health:age60TRUE`
0.0000

```

```
R> cat("theta estimate", fit.scad$theta[minBic])
```

```
theta estimate 1.255
```

Compute standard errors of coefficients and theta (the last one for theta).

```
R> se(fit.scad, minBic, log = FALSE)
```

```
[1] 0.14976 0.01824 0.10183 0.09383 0.07370 0.40910 0.04426 0.18012
[9] 0.19853 0.13251
```

Compute AIC, BIC, log-likelihood values of the selected model.

```
R> AIC(fit.scad)[minBic]
```

```
0.0331
7329
```

```
R> BIC(fit.scad)[minBic]
```

```
0.0331
7384
```

```
R> logLik(fit.scad)[minBic]
```

```
[1] -3655
```

Compute log-likelihood value via 10-fold cross-validation.

```
R> fitcv <- cv.zipath(docvisits ~ . | ., data = dat, family = "negbin",
  gamma.count = 2.5, gamma.zero = 2.5, lambda.count = tmp$lambda.count[1:30],
  lambda.zero = tmp$lambda.zero[1:30], maxit.em = 300,
  maxit.theta = 1, theta.fixed = FALSE, trace = FALSE,
  penalty = "snet", rescale = FALSE, foldid = foldid)
R> cat("cross-validated loglik", max(fitcv$cv))
```

```
cross-validated loglik -368.7
```

## References

- Regina T Riphahn, Achim Wambach, and Andreas Million. Incentive effects in the demand for health care: a bivariate panel count data estimation. *Journal of Applied Econometrics*, 18(4):387–405, 2003.
- Zhu Wang, Shuangge Ma, and Ching-Yun Wang. Variable selection for zero-inflated and overdispersed data with application to health care demand in germany. *Biometric Journal*, 2015. in press.
