# Supplementary material
Source: PubMed Central journal article supplement (PMC5525141)
Supplement: NIHMS875838-supplement-Supporting_Information.pdf [file NIHMS875838-supplement-Supporting_Information.pdf]

# Supporting Information to “Variable selection for zero-inflated and overdispersed data with application to health care demand in Germany”

Zhu Wang<sup>a\*</sup>, Shuangge Ma<sup>b</sup>, Ching-Yun Wang<sup>c</sup>

<sup>a</sup>Department of Research, Connecticut Children’s Medical Center, Department of Pediatrics, University of Connecticut School of Medicine, Hartford, CT, USA

<sup>b</sup>Department of Biostatistics, School of Public Health, Yale University, New Haven, CT, USA

<sup>c</sup>Division of Public Health, Fred Hutchinson Cancer Research Center, Seattle, WA, USA

\* E-mail: [zwang@connecticutchildrens.org](mailto:zwang@connecticutchildrens.org)

# List of Tables

|    |                                                                                 |    |
|----|---------------------------------------------------------------------------------|----|
| 1  | Simulation results with example 2, $\rho = 0.4, \theta = 2, n = 300$ . . . . .  | 3  |
| 2  | Simulation results with example 3, $\rho = 0.4, \theta = 2, n = 300$ . . . . .  | 3  |
| 3  | Simulation results with example 1, $\rho = 0.8, \theta = 2, n = 300$ . . . . .  | 4  |
| 4  | Simulation results with example 2, $\rho = 0.8, \theta = 2, n = 300$ . . . . .  | 4  |
| 5  | Simulation results with example 3, $\rho = 0.8, \theta = 2, n = 300$ . . . . .  | 5  |
| 6  | Simulation results with example 4, $\rho = 0.8, \theta = 2, n = 300$ . . . . .  | 5  |
| 7  | Simulation results with example 5, $\rho = 0.8, \theta = 2, n = 300$ . . . . .  | 6  |
| 8  | Simulation results with example 1, $\rho = 0.4, \theta = 10, n = 300$ . . . . . | 6  |
| 9  | Simulation results with example 2, $\rho = 0.4, \theta = 10, n = 300$ . . . . . | 7  |
| 10 | Simulation results with example 3, $\rho = 0.4, \theta = 10, n = 300$ . . . . . | 7  |
| 11 | Simulation results with example 4, $\rho = 0.4, \theta = 10, n = 300$ . . . . . | 8  |
| 12 | Simulation results with example 5, $\rho = 0.4, \theta = 10, n = 300$ . . . . . | 8  |
| 13 | Simulation results with example 1, $\rho = 0.8, \theta = 10, n = 300$ . . . . . | 9  |
| 14 | Simulation results with example 2, $\rho = 0.8, \theta = 10, n = 300$ . . . . . | 9  |
| 15 | Simulation results with example 3, $\rho = 0.8, \theta = 10, n = 300$ . . . . . | 10 |
| 16 | Simulation results with example 4, $\rho = 0.8, \theta = 10, n = 300$ . . . . . | 10 |
| 17 | Simulation results with example 5, $\rho = 0.8, \theta = 10, n = 300$ . . . . . | 11 |
| 18 | Simulation results with example 1, $\rho = 0.4, \theta = 2, n = 100$ . . . . .  | 11 |
| 19 | Simulation results with example 2, $\rho = 0.4, \theta = 2, n = 100$ . . . . .  | 12 |
| 20 | Simulation results with example 3, $\rho = 0.4, \theta = 2, n = 100$ . . . . .  | 13 |
| 21 | Simulation results with example 4, $\rho = 0.4, \theta = 2, n = 100$ . . . . .  | 13 |
| 22 | Simulation results with example 5, $\rho = 0.4, \theta = 2, n = 100$ . . . . .  | 14 |
| 23 | Simulation results with example 1, $\rho = 0.8, \theta = 2, n = 100$ . . . . .  | 14 |
| 24 | Simulation results with example 2, $\rho = 0.8, \theta = 2, n = 100$ . . . . .  | 15 |
| 25 | Simulation results with example 3, $\rho = 0.8, \theta = 2, n = 100$ . . . . .  | 15 |
| 26 | Simulation results with example 4, $\rho = 0.8, \theta = 2, n = 100$ . . . . .  | 16 |
| 27 | Simulation results with example 5, $\rho = 0.8, \theta = 2, n = 100$ . . . . .  | 16 |
| 28 | Simulation results with example 1, $\rho = 0.4, \theta = 10, n = 100$ . . . . . | 17 |
| 29 | Simulation results with example 2, $\rho = 0.4, \theta = 10, n = 100$ . . . . . | 17 |
| 30 | Simulation results with example 3, $\rho = 0.4, \theta = 10, n = 100$ . . . . . | 18 |
| 31 | Simulation results with example 4, $\rho = 0.4, \theta = 10, n = 100$ . . . . . | 18 |
| 32 | Simulation results with example 5, $\rho = 0.4, \theta = 10, n = 100$ . . . . . | 19 |
| 33 | Simulation results with example 1, $\rho = 0.8, \theta = 10, n = 100$ . . . . . | 19 |
| 34 | Simulation results with example 2, $\rho = 0.8, \theta = 10, n = 100$ . . . . . | 20 |
| 35 | Simulation results with example 3, $\rho = 0.8, \theta = 10, n = 100$ . . . . . | 20 |
| 36 | Simulation results with example 4, $\rho = 0.8, \theta = 10, n = 100$ . . . . . | 21 |
| 37 | Simulation results with example 5, $\rho = 0.8, \theta = 10, n = 100$ . . . . . | 21 |

Table 1: Simulation results with example 2,  $\rho = 0.4, \theta = 2, n = 300$ . Median and robust standard deviations (in parentheses) of the MSE ratio between the penalized model and full model, and the estimated  $\theta$ . Mean and standard deviations of sensitivity and specificity.

| Method                | MSE                  | Sensitivity          | Specificity          | $\hat{\theta}$      |
|-----------------------|----------------------|----------------------|----------------------|---------------------|
| <b>NB component</b>   |                      |                      |                      |                     |
| NB-LASSO              | 0.806 (0.47)         | 0.971 (0.15)         | 0.907 (0.092)        | 0.768 (0.104)       |
| NB-MCP                | 0.826 (0.522)        | 0.971 (0.118)        | 0.944 (0.072)        | 0.805 (0.116)       |
| NB-SCAD               | 0.826 (0.54)         | 0.979 (0.101)        | 0.904 (0.097)        | 0.799 (0.109)       |
| ZINB-LASSO            | 0.308 (0.228)        | 0.979 (0.12)         | 0.949 (0.067)        | 2.424 (0.578)       |
| ZINB-MCP              | 0.136 (0.155)        | 0.933 (0.171)        | <b>0.984</b> (0.045) | 2.32 (0.782)        |
| ZINB-SCAD             | <b>0.102</b> (0.106) | 0.962 (0.133)        | 0.979 (0.047)        | <b>2.262</b> (0.65) |
| BE(0.1573)            | 0.598 (0.249)        | <b>1</b> (0)         | 0.755 (0.131)        | 2.777 (1.028)       |
| BE(0.05)              | 0.281 (0.248)        | 0.995 (0.047)        | 0.916 (0.091)        | 2.471 (0.818)       |
| BE(0.01)              | 0.105 (0.11)         | 0.973 (0.114)        | 0.982 (0.038)        | 2.312 (0.653)       |
| ZINB-ORACLE           | 0.063 (0.057)        | 1 (0)                | 1 (0)                | 2.26 (0.576)        |
| <b>Zero component</b> |                      |                      |                      |                     |
| ZINB-LASSO            | 0.292 (0.32)         | 0.578 (0.287)        | 0.932 (0.087)        |                     |
| ZINB-MCP              | 0.521 (0.448)        | <b>0.786</b> (0.201) | 0.765 (0.179)        |                     |
| ZINB-SCAD             | <b>0.279</b> (0.269) | 0.521 (0.255)        | 0.956 (0.069)        |                     |
| BE(0.1573)            | 0.609 (0.395)        | 0.743 (0.206)        | 0.761 (0.143)        |                     |
| BE(0.05)              | 0.412 (0.362)        | 0.597 (0.232)        | 0.929 (0.076)        |                     |
| BE(0.01)              | 0.348 (0.283)        | 0.358 (0.245)        | <b>0.983</b> (0.04)  |                     |
| ZINB-ORACLE           | 0.095 (0.096)        | 1 (0)                | 1 (0)                |                     |

Table 2: Simulation results with example 3,  $\rho = 0.4, \theta = 2, n = 300$ . Median and robust standard deviations (in parentheses) of the MSE ratio between the penalized model and full model, and the estimated  $\theta$ . Mean and standard deviations of sensitivity and specificity.

| Method                | MSE                  | Sensitivity          | Specificity          | $\hat{\theta}$      |
|-----------------------|----------------------|----------------------|----------------------|---------------------|
| <b>NB component</b>   |                      |                      |                      |                     |
| NB-LASSO              | 1.787 (0.989)        | 0.82 (0.348)         | 0.889 (0.108)        | 0.456 (0.078)       |
| NB-MCP                | 2.313 (1.342)        | 0.851 (0.281)        | 0.891 (0.089)        | 0.483 (0.072)       |
| NB-SCAD               | 2.312 (1.353)        | 0.866 (0.275)        | 0.86 (0.109)         | 0.481 (0.076)       |
| ZINB-LASSO            | 0.289 (0.246)        | 0.938 (0.181)        | 0.924 (0.082)        | 2.29 (0.689)        |
| ZINB-MCP              | <b>0.077</b> (0.093) | 0.923 (0.196)        | <b>0.982</b> (0.034) | 2.197 (0.76)        |
| ZINB-SCAD             | 0.168 (0.209)        | 0.923 (0.196)        | 0.962 (0.06)         | 2.172 (0.694)       |
| BE(0.1573)            | 0.562 (0.225)        | <b>0.974</b> (0.111) | 0.769 (0.124)        | 2.789 (0.961)       |
| BE(0.05)              | 0.267 (0.264)        | 0.954 (0.163)        | 0.928 (0.071)        | 2.401 (0.861)       |
| BE(0.01)              | 0.099 (0.126)        | 0.918 (0.2)          | 0.979 (0.04)         | <b>2.11</b> (0.684) |
| ZINB-ORACLE           | 0.049 (0.048)        | 1 (0)                | 1 (0)                | 2.141 (0.656)       |
| <b>Zero component</b> |                      |                      |                      |                     |
| ZINB-LASSO            | 0.385 (0.288)        | 0.634 (0.302)        | 0.954 (0.065)        |                     |
| ZINB-MCP              | <b>0.367</b> (0.284) | 0.791 (0.193)        | 0.917 (0.085)        |                     |
| ZINB-SCAD             | 0.377 (0.263)        | 0.572 (0.242)        | 0.97 (0.047)         |                     |
| BE(0.1573)            | 0.624 (0.254)        | <b>0.835</b> (0.187) | 0.778 (0.14)         |                     |
| BE(0.05)              | 0.423 (0.278)        | 0.729 (0.221)        | 0.927 (0.084)        |                     |
| BE(0.01)              | 0.408 (0.288)        | 0.508 (0.23)         | <b>0.979</b> (0.04)  |                     |
| ZINB-ORACLE           | 0.084 (0.067)        | 1 (0)                | 1 (0)                |                     |

Table 3: Simulation results with example 1,  $\rho = 0.8, \theta = 2, n = 300$ . Median and robust standard deviations (in parentheses) of the MSE ratio between the penalized model and full model, and the estimated  $\theta$ . Mean and standard deviations of sensitivity and specificity.

| Method                | MSE                  | Sensitivity          | Specificity          | $\hat{\theta}$      |
|-----------------------|----------------------|----------------------|----------------------|---------------------|
| <b>NB component</b>   |                      |                      |                      |                     |
| NB-LASSO              | 1.009 (0.5)          | 0.622 (0.359)        | 0.819 (0.094)        | 0.316 (0.041)       |
| NB-MCP                | 1.409 (0.773)        | 0.459 (0.357)        | 0.901 (0.058)        | 0.331 (0.043)       |
| NB-SCAD               | 1.425 (0.729)        | 0.459 (0.364)        | 0.88 (0.067)         | 0.328 (0.044)       |
| ZINB-LASSO            | <b>0.118</b> (0.095) | <b>0.837</b> (0.285) | 0.887 (0.076)        | 2.229 (0.659)       |
| ZINB-MCP              | 0.158 (0.203)        | 0.566 (0.377)        | <b>0.957</b> (0.045) | <b>2.069</b> (0.59) |
| ZINB-SCAD             | 0.191 (0.218)        | 0.648 (0.368)        | 0.93 (0.069)         | 2.138 (0.637)       |
| BE(0.1573)            | 0.64 (0.289)         | 0.742 (0.317)        | 0.722 (0.137)        | 2.846 (0.908)       |
| BE(0.05)              | 0.353 (0.297)        | 0.668 (0.339)        | 0.868 (0.101)        | 2.478 (0.792)       |
| BE(0.01)              | 0.177 (0.222)        | 0.611 (0.359)        | 0.949 (0.059)        | 2.101 (0.595)       |
| ZINB-ORACLE           | 0.018 (0.017)        | 1 (0)                | 1 (0)                | 2.108 (0.566)       |
| <b>Zero component</b> |                      |                      |                      |                     |
| ZINB-LASSO            | <b>0.191</b> (0.134) | 0.365 (0.239)        | 0.952 (0.056)        |                     |
| ZINB-MCP              | 0.234 (0.154)        | 0.487 (0.25)         | 0.95 (0.044)         |                     |
| ZINB-SCAD             | 0.252 (0.188)        | 0.349 (0.223)        | <b>0.973</b> (0.039) |                     |
| BE(0.1573)            | 0.53 (0.284)         | <b>0.634</b> (0.241) | 0.756 (0.132)        |                     |
| BE(0.05)              | 0.355 (0.244)        | 0.526 (0.251)        | 0.896 (0.086)        |                     |
| BE(0.01)              | 0.287 (0.202)        | 0.376 (0.233)        | 0.962 (0.043)        |                     |
| ZINB-ORACLE           | 0.046 (0.037)        | 1 (0)                | 1 (0)                |                     |

Table 4: Simulation results with example 2,  $\rho = 0.8, \theta = 2, n = 300$ . Median and robust standard deviations (in parentheses) of the MSE ratio between the penalized model and full model, and the estimated  $\theta$ . Mean and standard deviations of sensitivity and specificity.

| Method                | MSE                  | Sensitivity          | Specificity          | $\hat{\theta}$       |
|-----------------------|----------------------|----------------------|----------------------|----------------------|
| <b>NB component</b>   |                      |                      |                      |                      |
| NB-LASSO              | 0.377 (0.238)        | 0.925 (0.194)        | 0.831 (0.076)        | 0.857 (0.127)        |
| NB-MCP                | 0.623 (0.505)        | 0.747 (0.291)        | 0.945 (0.048)        | 0.849 (0.133)        |
| NB-SCAD               | 0.6 (0.52)           | 0.737 (0.309)        | 0.944 (0.057)        | 0.846 (0.116)        |
| ZINB-LASSO            | 0.162 (0.138)        | <b>0.93</b> (0.203)  | 0.906 (0.073)        | 2.499 (0.516)        |
| ZINB-MCP              | 0.119 (0.159)        | 0.763 (0.3)          | 0.965 (0.043)        | 2.326 (0.605)        |
| ZINB-SCAD             | <b>0.086</b> (0.115) | 0.806 (0.295)        | <b>0.971</b> (0.042) | <b>2.252</b> (0.475) |
| BE(0.1573)            | 0.625 (0.286)        | 0.849 (0.231)        | 0.746 (0.142)        | 2.813 (0.786)        |
| BE(0.05)              | 0.345 (0.332)        | 0.812 (0.254)        | 0.896 (0.098)        | 2.55 (0.606)         |
| BE(0.01)              | 0.134 (0.183)        | 0.785 (0.27)         | 0.964 (0.048)        | 2.34 (0.537)         |
| ZINB-ORACLE           | 0.023 (0.021)        | 1 (0)                | 1 (0)                | 2.317 (0.456)        |
| <b>Zero component</b> |                      |                      |                      |                      |
| ZINB-LASSO            | <b>0.116</b> (0.105) | 0.36 (0.223)         | 0.947 (0.06)         |                      |
| ZINB-MCP              | 0.203 (0.195)        | 0.53 (0.241)         | 0.862 (0.095)        |                      |
| ZINB-SCAD             | 0.152 (0.145)        | 0.312 (0.197)        | <b>0.967</b> (0.044) |                      |
| BE(0.1573)            | 0.554 (0.307)        | <b>0.565</b> (0.244) | 0.735 (0.14)         |                      |
| BE(0.05)              | 0.254 (0.217)        | 0.419 (0.242)        | 0.907 (0.084)        |                      |
| BE(0.01)              | 0.163 (0.156)        | 0.255 (0.205)        | 0.966 (0.047)        |                      |
| ZINB-ORACLE           | 0.034 (0.038)        | 1 (0)                | 1 (0)                |                      |

Table 5: Simulation results with example 3,  $\rho = 0.8, \theta = 2, n = 300$ . Median and robust standard deviations (in parentheses) of the MSE ratio between the penalized model and full model, and the estimated  $\theta$ . Mean and standard deviations of sensitivity and specificity.

| Method                | MSE                  | Sensitivity          | Specificity          | $\hat{\theta}$       |
|-----------------------|----------------------|----------------------|----------------------|----------------------|
| <b>NB component</b>   |                      |                      |                      |                      |
| NB-LASSO              | 0.715 (0.463)        | 0.821 (0.272)        | 0.816 (0.076)        | 0.511 (0.058)        |
| NB-MCP                | 1.193 (0.779)        | 0.6 (0.323)          | 0.914 (0.061)        | 0.521 (0.052)        |
| NB-SCAD               | 1.126 (0.732)        | 0.621 (0.324)        | 0.899 (0.069)        | 0.514 (0.051)        |
| ZINB-LASSO            | <b>0.135</b> (0.111) | <b>0.884</b> (0.212) | 0.888 (0.073)        | 2.314 (0.491)        |
| ZINB-MCP              | 0.202 (0.234)        | 0.684 (0.31)         | <b>0.96</b> (0.04)   | 2.229 (0.605)        |
| ZINB-SCAD             | 0.188 (0.227)        | 0.716 (0.306)        | 0.95 (0.055)         | <b>2.191</b> (0.642) |
| BE(0.1573)            | 0.597 (0.233)        | 0.816 (0.263)        | 0.739 (0.129)        | 2.729 (0.866)        |
| BE(0.05)              | 0.363 (0.251)        | 0.747 (0.308)        | 0.888 (0.09)         | 2.473 (0.738)        |
| BE(0.01)              | 0.223 (0.295)        | 0.689 (0.328)        | 0.954 (0.049)        | 2.227 (0.636)        |
| ZINB-ORACLE           | 0.023 (0.021)        | 1 (0)                | 1 (0)                | 2.138 (0.532)        |
| <b>Zero component</b> |                      |                      |                      |                      |
| ZINB-LASSO            | <b>0.176</b> (0.118) | 0.403 (0.231)        | 0.943 (0.06)         |                      |
| ZINB-MCP              | 0.282 (0.219)        | 0.495 (0.255)        | 0.938 (0.065)        |                      |
| ZINB-SCAD             | 0.295 (0.164)        | 0.363 (0.199)        | 0.957 (0.049)        |                      |
| BE(0.1573)            | 0.575 (0.254)        | <b>0.611</b> (0.252) | 0.757 (0.131)        |                      |
| BE(0.05)              | 0.407 (0.276)        | 0.471 (0.227)        | 0.885 (0.095)        |                      |
| BE(0.01)              | 0.283 (0.195)        | 0.316 (0.216)        | <b>0.961</b> (0.045) |                      |
| ZINB-ORACLE           | 0.046 (0.035)        | 1 (0)                | 1 (0)                |                      |

Table 6: Simulation results with example 4,  $\rho = 0.8, \theta = 2, n = 300$ . Median and robust standard deviations (in parentheses) of the MSE ratio between the penalized model and full model, and the estimated  $\theta$ . Mean and standard deviations of sensitivity and specificity.

| Method                | MSE                  | Sensitivity          | Specificity          | $\hat{\theta}$       |
|-----------------------|----------------------|----------------------|----------------------|----------------------|
| <b>NB component</b>   |                      |                      |                      |                      |
| NB-LASSO              | 0.992 (0.372)        | 0.164 (0.196)        | 0.938 (0.073)        | 0.591 (0.076)        |
| NB-MCP                | 1.091 (0.453)        | 0.31 (0.201)         | 0.93 (0.055)         | 0.649 (0.093)        |
| NB-SCAD               | 1.127 (0.486)        | 0.364 (0.241)        | 0.91 (0.078)         | 0.661 (0.098)        |
| ZINB-LASSO            | 0.737 (0.338)        | 0.307 (0.298)        | 0.917 (0.087)        | 1.839 (0.497)        |
| ZINB-MCP              | 0.691 (0.252)        | 0.398 (0.268)        | <b>0.939</b> (0.057) | <b>2.076</b> (0.488) |
| ZINB-SCAD             | 0.654 (0.276)        | 0.488 (0.284)        | 0.917 (0.071)        | 2.101 (0.576)        |
| BE(0.1573)            | 0.74 (0.263)         | <b>0.726</b> (0.225) | 0.757 (0.133)        | 2.452 (0.614)        |
| BE(0.05)              | <b>0.62</b> (0.334)  | 0.607 (0.246)        | 0.88 (0.107)         | 2.299 (0.426)        |
| BE(0.01)              | 0.719 (0.368)        | 0.467 (0.225)        | 0.937 (0.063)        | 2.11 (0.395)         |
| ZINB-ORACLE           | 0.111 (0.063)        | 1 (0)                | 1 (0)                | 2.24 (0.441)         |
| <b>Zero component</b> |                      |                      |                      |                      |
| ZINB-LASSO            | <b>0.207</b> (0.145) | 0.176 (0.181)        | <b>0.951</b> (0.061) |                      |
| ZINB-MCP              | 0.352 (0.256)        | 0.445 (0.208)        | 0.764 (0.148)        |                      |
| ZINB-SCAD             | 0.313 (0.169)        | 0.252 (0.167)        | 0.918 (0.069)        |                      |
| BE(0.1573)            | 0.576 (0.261)        | <b>0.463</b> (0.188) | 0.738 (0.126)        |                      |
| BE(0.05)              | 0.413 (0.229)        | 0.325 (0.188)        | 0.864 (0.099)        |                      |
| BE(0.01)              | 0.323 (0.26)         | 0.204 (0.171)        | 0.943 (0.06)         |                      |
| ZINB-ORACLE           | 0.074 (0.059)        | 1 (0)                | 1 (0)                |                      |

Table 7: Simulation results with example 5,  $\rho = 0.8, \theta = 2, n = 300$ . Median and robust standard deviations (in parentheses) of the MSE ratio between the penalized model and full model, and the estimated  $\theta$ . Mean and standard deviations of sensitivity and specificity.

| Method                | MSE                  | Sensitivity          | Specificity          | $\hat{\theta}$     |
|-----------------------|----------------------|----------------------|----------------------|--------------------|
| <b>NB component</b>   |                      |                      |                      |                    |
| NB-LASSO              | 0.746 (0.49)         | 0.974 (0.133)        | 0.837 (0.087)        | 0.743 (0.093)      |
| NB-MCP                | 0.491 (0.308)        | 0.928 (0.177)        | 0.943 (0.054)        | 0.741 (0.09)       |
| NB-SCAD               | 0.589 (0.536)        | 0.928 (0.177)        | 0.921 (0.067)        | 0.738 (0.097)      |
| ZINB-LASSO            | 0.305 (0.197)        | <b>0.995</b> (0.051) | 0.92 (0.069)         | 2.136 (0.358)      |
| ZINB-MCP              | 0.103 (0.104)        | 0.979 (0.1)          | <b>0.99</b> (0.026)  | 2.033 (0.371)      |
| ZINB-SCAD             | <b>0.082</b> (0.091) | 0.964 (0.13)         | 0.983 (0.037)        | <b>2.015</b> (0.4) |
| BE(0.1573)            | 0.622 (0.224)        | 0.985 (0.087)        | 0.769 (0.119)        | 2.335 (0.482)      |
| BE(0.05)              | 0.217 (0.227)        | 0.974 (0.111)        | 0.927 (0.079)        | 2.102 (0.414)      |
| BE(0.01)              | 0.082 (0.083)        | 0.969 (0.121)        | 0.985 (0.033)        | 2.044 (0.382)      |
| ZINB-ORACLE           | 0.059 (0.051)        | 1 (0)                | 1 (0)                | 2.034 (0.361)      |
| <b>Zero component</b> |                      |                      |                      |                    |
| ZINB-LASSO            | <b>0.426</b> (0.41)  | 0.523 (0.28)         | 0.934 (0.068)        |                    |
| ZINB-MCP              | 0.482 (0.324)        | 0.673 (0.218)        | 0.881 (0.1)          |                    |
| ZINB-SCAD             | 0.498 (0.408)        | 0.459 (0.233)        | 0.965 (0.043)        |                    |
| BE(0.1573)            | 0.65 (0.341)         | <b>0.711</b> (0.211) | 0.782 (0.117)        |                    |
| BE(0.05)              | 0.518 (0.351)        | 0.549 (0.221)        | 0.913 (0.093)        |                    |
| BE(0.01)              | 0.52 (0.381)         | 0.394 (0.21)         | <b>0.971</b> (0.041) |                    |
| ZINB-ORACLE           | 0.098 (0.079)        | 1 (0)                | 1 (0)                |                    |

Table 8: Simulation results with example 1,  $\rho = 0.4, \theta = 10, n = 300$ . Median and robust standard deviations (in parentheses) of the MSE ratio between the penalized model and full model, and the estimated  $\theta$ . Mean and standard deviations of sensitivity and specificity.

| Method                | MSE                  | Sensitivity          | Specificity          | $\hat{\theta}$        |
|-----------------------|----------------------|----------------------|----------------------|-----------------------|
| <b>NB component</b>   |                      |                      |                      |                       |
| NB-LASSO              | 6.364 (2.677)        | 0.801 (0.364)        | 0.863 (0.113)        | 0.406 (0.099)         |
| NB-MCP                | 7.538 (3.424)        | 0.847 (0.273)        | 0.871 (0.093)        | 0.418 (0.076)         |
| NB-SCAD               | 7.792 (3.789)        | 0.837 (0.311)        | 0.844 (0.109)        | 0.421 (0.079)         |
| ZINB-LASSO            | 0.287 (0.239)        | <b>0.995</b> (0.051) | 0.94 (0.073)         | <b>12.919</b> (8.289) |
| ZINB-MCP              | 0.122 (0.103)        | 0.985 (0.087)        | <b>0.985</b> (0.032) | 13.615 (9.438)        |
| ZINB-SCAD             | <b>0.099</b> (0.099) | 0.974 (0.111)        | 0.978 (0.057)        | 13.011 (9.103)        |
| BE(0.1573)            | 0.625 (0.224)        | 0.995 (0.051)        | 0.771 (0.119)        | 31.598 (33.099)       |
| BE(0.05)              | 0.279 (0.251)        | 0.995 (0.051)        | 0.916 (0.093)        | 19.925 (16.695)       |
| BE(0.01)              | 0.113 (0.098)        | 0.979 (0.1)          | 0.983 (0.033)        | 14.294 (9.898)        |
| ZINB-ORACLE           | 0.074 (0.063)        | 1 (0)                | 1 (0)                | 13.054 (8.789)        |
| <b>Zero component</b> |                      |                      |                      |                       |
| ZINB-LASSO            | 0.582 (0.387)        | 0.735 (0.278)        | 0.959 (0.055)        |                       |
| ZINB-MCP              | <b>0.364</b> (0.265) | 0.829 (0.182)        | 0.959 (0.05)         |                       |
| ZINB-SCAD             | 0.465 (0.353)        | 0.645 (0.276)        | 0.985 (0.031)        |                       |
| BE(0.1573)            | 0.52 (0.228)         | <b>0.93</b> (0.139)  | 0.832 (0.105)        |                       |
| BE(0.05)              | 0.387 (0.282)        | 0.84 (0.192)         | 0.941 (0.072)        |                       |
| BE(0.01)              | 0.505 (0.338)        | 0.642 (0.257)        | <b>0.986</b> (0.036) |                       |
| ZINB-ORACLE           | 0.145 (0.1)          | 1 (0)                | 1 (0)                |                       |

Table 9: Simulation results with example 2,  $\rho = 0.4, \theta = 10, n = 300$ . Median and robust standard deviations (in parentheses) of the MSE ratio between the penalized model and full model, and the estimated  $\theta$ . Mean and standard deviations of sensitivity and specificity.

| Method                | MSE                  | Sensitivity         | Specificity          | $\hat{\theta}$       |
|-----------------------|----------------------|---------------------|----------------------|----------------------|
| <b>NB component</b>   |                      |                     |                      |                      |
| NB-LASSO              | 1.795 (0.88)         | 1 (0)               | 0.878 (0.101)        | 1.487 (0.282)        |
| NB-MCP                | 1.891 (0.911)        | 0.99 (0.102)        | 0.947 (0.077)        | 1.515 (0.285)        |
| NB-SCAD               | 1.801 (0.795)        | 1 (0)               | 0.93 (0.074)         | 1.545 (0.28)         |
| ZINB-LASSO            | 0.381 (0.277)        | 1 (0)               | 0.949 (0.062)        | 11.482 (4.748)       |
| ZINB-MCP              | 0.117 (0.102)        | 1 (0)               | <b>0.994</b> (0.025) | 11.691 (5.305)       |
| ZINB-SCAD             | 0.105 (0.082)        | 1 (0)               | 0.99 (0.034)         | <b>11.42</b> (5.335) |
| BE(0.1573)            | 0.605 (0.192)        | 1 (0)               | 0.787 (0.105)        | 16.323 (10.053)      |
| BE(0.05)              | 0.276 (0.224)        | 1 (0)               | 0.931 (0.074)        | 13.242 (6.467)       |
| BE(0.01)              | <b>0.099</b> (0.085) | 1 (0)               | 0.99 (0.027)         | 11.925 (5.358)       |
| ZINB-ORACLE           | 0.077 (0.065)        | 1 (0)               | 1 (0)                | 11.818 (5.531)       |
| <b>Zero component</b> |                      |                     |                      |                      |
| ZINB-LASSO            | <b>0.389</b> (0.347) | 0.698 (0.283)       | 0.946 (0.064)        |                      |
| ZINB-MCP              | 0.475 (0.24)         | <b>0.875</b> (0.17) | 0.807 (0.13)         |                      |
| ZINB-SCAD             | 0.408 (0.305)        | 0.589 (0.269)       | 0.972 (0.049)        |                      |
| BE(0.1573)            | 0.543 (0.296)        | 0.852 (0.172)       | 0.794 (0.132)        |                      |
| BE(0.05)              | 0.398 (0.241)        | 0.701 (0.213)       | 0.935 (0.08)         |                      |
| BE(0.01)              | 0.423 (0.223)        | 0.479 (0.228)       | <b>0.983</b> (0.036) |                      |
| ZINB-ORACLE           | 0.095 (0.09)         | 1 (0)               | 1 (0)                |                      |

Table 10: Simulation results with example 3,  $\rho = 0.4, \theta = 10, n = 300$ . Median and robust standard deviations (in parentheses) of the MSE ratio between the penalized model and full model, and the estimated  $\theta$ . Mean and standard deviations of sensitivity and specificity.

| Method                | MSE                  | Sensitivity          | Specificity          | $\hat{\theta}$        |
|-----------------------|----------------------|----------------------|----------------------|-----------------------|
| <b>NB component</b>   |                      |                      |                      |                       |
| NB-LASSO              | 4.288 (1.752)        | 0.954 (0.162)        | 0.864 (0.1)          | 0.705 (0.145)         |
| NB-MCP                | 4.884 (2.218)        | 0.954 (0.162)        | 0.888 (0.088)        | 0.755 (0.133)         |
| NB-SCAD               | 4.744 (2.012)        | 0.964 (0.129)        | 0.864 (0.094)        | 0.737 (0.131)         |
| ZINB-LASSO            | 0.324 (0.234)        | 1 (0)                | 0.947 (0.063)        | <b>10.964</b> (5.363) |
| ZINB-MCP              | <b>0.123</b> (0.097) | 0.995 (0.051)        | <b>0.987</b> (0.034) | 11.952 (6.244)        |
| ZINB-SCAD             | 0.128 (0.094)        | 0.995 (0.051)        | 0.984 (0.043)        | 11.854 (6.199)        |
| BE(0.1573)            | 0.598 (0.243)        | 1 (0)                | 0.79 (0.114)         | 18.2 (14.11)          |
| BE(0.05)              | 0.324 (0.242)        | 1 (0)                | 0.922 (0.077)        | 14.51 (9.911)         |
| BE(0.01)              | 0.146 (0.13)         | 1 (0)                | 0.981 (0.037)        | 12.687 (7.113)        |
| ZINB-ORACLE           | 0.096 (0.07)         | 1 (0)                | 1 (0)                | 11.649 (5.979)        |
| <b>Zero component</b> |                      |                      |                      |                       |
| ZINB-LASSO            | 0.472 (0.355)        | 0.717 (0.273)        | 0.946 (0.064)        |                       |
| ZINB-MCP              | 0.403 (0.311)        | 0.829 (0.189)        | 0.938 (0.075)        |                       |
| ZINB-SCAD             | 0.45 (0.34)          | 0.699 (0.227)        | 0.974 (0.043)        |                       |
| BE(0.1573)            | 0.598 (0.212)        | <b>0.908</b> (0.145) | 0.817 (0.107)        |                       |
| BE(0.05)              | <b>0.388</b> (0.305) | 0.832 (0.182)        | 0.945 (0.055)        |                       |
| BE(0.01)              | 0.496 (0.355)        | 0.599 (0.235)        | <b>0.985</b> (0.03)  |                       |
| ZINB-ORACLE           | 0.12 (0.09)          | 1 (0)                | 1 (0)                |                       |

Table 11: Simulation results with example 4,  $\rho = 0.4, \theta = 10, n = 300$ . Median and robust standard deviations (in parentheses) of the MSE ratio between the penalized model and full model, and the estimated  $\theta$ . Mean and standard deviations of sensitivity and specificity.

| Method                | MSE                  | Sensitivity         | Specificity          | $\hat{\theta}$       |
|-----------------------|----------------------|---------------------|----------------------|----------------------|
| <b>NB component</b>   |                      |                     |                      |                      |
| NB-LASSO              | 4.587 (1.907)        | 0.845 (0.233)       | 0.822 (0.14)         | 1.066 (0.223)        |
| NB-MCP                | 4.733 (1.843)        | 0.845 (0.163)       | 0.899 (0.085)        | 1.133 (0.227)        |
| NB-SCAD               | 4.769 (1.742)        | 0.896 (0.158)       | 0.86 (0.102)         | 1.142 (0.208)        |
| ZINB-LASSO            | 0.989 (0.466)        | 0.996 (0.025)       | 0.851 (0.105)        | <b>10.32</b> (3.445) |
| ZINB-MCP              | 0.385 (0.226)        | 0.994 (0.03)        | 0.972 (0.052)        | 11.28 (3.848)        |
| ZINB-SCAD             | 0.327 (0.246)        | 0.996 (0.025)       | 0.95 (0.071)         | 11.69 (4.307)        |
| BE(0.1573)            | 0.683 (0.194)        | <b>1</b> (0)        | 0.806 (0.119)        | 14.084 (5.458)       |
| BE(0.05)              | 0.448 (0.228)        | 0.998 (0.018)       | 0.94 (0.065)         | 12.947 (4.933)       |
| BE(0.01)              | <b>0.296</b> (0.216) | 0.994 (0.03)        | <b>0.982</b> (0.044) | 11.912 (4.478)       |
| ZINB-ORACLE           | 0.214 (0.123)        | 1 (0)               | 1 (0)                | 11.758 (4.208)       |
| <b>Zero component</b> |                      |                     |                      |                      |
| ZINB-LASSO            | 0.647 (0.459)        | 0.576 (0.259)       | 0.939 (0.091)        |                      |
| ZINB-MCP              | 0.691 (0.24)         | <b>0.79</b> (0.178) | 0.828 (0.135)        |                      |
| ZINB-SCAD             | 0.714 (0.37)         | 0.545 (0.249)       | 0.962 (0.061)        |                      |
| BE(0.1573)            | 0.761 (0.255)        | 0.778 (0.153)       | 0.827 (0.11)         |                      |
| BE(0.05)              | <b>0.643</b> (0.262) | 0.653 (0.188)       | 0.932 (0.073)        |                      |
| BE(0.01)              | 0.777 (0.326)        | 0.402 (0.223)       | <b>0.982</b> (0.044) |                      |
| ZINB-ORACLE           | 0.208 (0.118)        | 1 (0)               | 1 (0)                |                      |

Table 12: Simulation results with example 5,  $\rho = 0.4, \theta = 10, n = 300$ . Median and robust standard deviations (in parentheses) of the MSE ratio between the penalized model and full model, and the estimated  $\theta$ . Mean and standard deviations of sensitivity and specificity.

| Method                | MSE                  | Sensitivity          | Specificity          | $\hat{\theta}$       |
|-----------------------|----------------------|----------------------|----------------------|----------------------|
| <b>NB component</b>   |                      |                      |                      |                      |
| NB-LASSO              | 4.19 (2.444)         | <b>1</b> (0)         | 0.905 (0.08)         | 1.167 (0.159)        |
| NB-MCP                | 1.71 (1.287)         | 1 (0)                | 0.957 (0.067)        | 1.209 (0.162)        |
| NB-SCAD               | 1.725 (1.236)        | 1 (0)                | 0.923 (0.087)        | 1.201 (0.176)        |
| ZINB-LASSO            | 1.069 (0.806)        | 1 (0)                | 0.97 (0.04)          | <b>9.883</b> (2.888) |
| ZINB-MCP              | 0.264 (0.286)        | 1 (0)                | <b>0.996</b> (0.014) | 10.445 (2.793)       |
| ZINB-SCAD             | <b>0.218</b> (0.191) | 1 (0)                | 0.989 (0.025)        | 10.539 (2.854)       |
| BE(0.1573)            | 0.62 (0.202)         | 1 (0)                | 0.812 (0.106)        | 12.278 (3.562)       |
| BE(0.05)              | 0.39 (0.209)         | 1 (0)                | 0.939 (0.066)        | 11.074 (3.428)       |
| BE(0.01)              | 0.248 (0.197)        | 1 (0)                | 0.988 (0.026)        | 10.466 (2.843)       |
| ZINB-ORACLE           | 0.18 (0.166)         | 1 (0)                | 1 (0)                | 10.419 (2.7)         |
| <b>Zero component</b> |                      |                      |                      |                      |
| ZINB-LASSO            | 1.261 (1.048)        | 0.773 (0.233)        | 0.952 (0.064)        |                      |
| ZINB-MCP              | 0.623 (0.313)        | 0.921 (0.127)        | 0.828 (0.12)         |                      |
| ZINB-SCAD             | 0.77 (0.615)         | 0.712 (0.242)        | 0.98 (0.04)          |                      |
| BE(0.1573)            | 0.683 (0.245)        | <b>0.923</b> (0.145) | 0.811 (0.1)          |                      |
| BE(0.05)              | <b>0.603</b> (0.416) | 0.847 (0.195)        | 0.939 (0.056)        |                      |
| BE(0.01)              | 1.022 (0.896)        | 0.638 (0.241)        | <b>0.987</b> (0.033) |                      |
| ZINB-ORACLE           | 0.252 (0.175)        | 1 (0)                | 1 (0)                |                      |



Table 13: Simulation results with example 1,  $\rho = 0.8, \theta = 10, n = 300$ . Median and robust standard deviations (in parentheses) of the MSE ratio between the penalized model and full model, and the estimated  $\theta$ . Mean and standard deviations of sensitivity and specificity.

| Method                | MSE                  | Sensitivity          | Specificity          | $\hat{\theta}$       |
|-----------------------|----------------------|----------------------|----------------------|----------------------|
| <b>NB component</b>   |                      |                      |                      |                      |
| NB-LASSO              | 2.706 (1.52)         | 0.732 (0.307)        | 0.788 (0.087)        | 0.447 (0.082)        |
| NB-MCP                | 3.767 (2.045)        | 0.521 (0.367)        | 0.895 (0.059)        | 0.471 (0.078)        |
| NB-SCAD               | 3.727 (2.151)        | 0.546 (0.376)        | 0.873 (0.067)        | 0.468 (0.074)        |
| ZINB-LASSO            | 0.14 (0.113)         | <b>0.979</b> (0.123) | 0.88 (0.084)         | <b>11.472</b> (6.25) |
| ZINB-MCP              | <b>0.06</b> (0.077)  | 0.881 (0.248)        | <b>0.973</b> (0.042) | 12.759 (7.341)       |
| ZINB-SCAD             | 0.092 (0.12)         | 0.835 (0.277)        | 0.961 (0.054)        | 11.907 (6.31)        |
| BE(0.1573)            | 0.63 (0.306)         | 0.918 (0.2)          | 0.724 (0.137)        | 26.248 (23.51)       |
| BE(0.05)              | 0.292 (0.273)        | 0.892 (0.219)        | 0.885 (0.092)        | 17.096 (12.592)      |
| BE(0.01)              | 0.084 (0.113)        | 0.876 (0.229)        | 0.968 (0.047)        | 13.335 (7.747)       |
| ZINB-ORACLE           | 0.025 (0.026)        | 1 (0)                | 1 (0)                | 11.684 (7.011)       |
| <b>Zero component</b> |                      |                      |                      |                      |
| ZINB-LASSO            | <b>0.233</b> (0.134) | 0.505 (0.245)        | 0.93 (0.066)         |                      |
| ZINB-MCP              | 0.288 (0.202)        | 0.485 (0.27)         | 0.952 (0.055)        |                      |
| ZINB-SCAD             | 0.316 (0.172)        | 0.41 (0.25)          | <b>0.965</b> (0.04)  |                      |
| BE(0.1573)            | 0.621 (0.253)        | <b>0.67</b> (0.238)  | 0.776 (0.113)        |                      |
| BE(0.05)              | 0.49 (0.258)         | 0.58 (0.238)         | 0.893 (0.086)        |                      |
| BE(0.01)              | 0.374 (0.256)        | 0.436 (0.248)        | 0.96 (0.056)         |                      |
| ZINB-ORACLE           | 0.063 (0.047)        | 1 (0)                | 1 (0)                |                      |

Table 14: Simulation results with example 2,  $\rho = 0.8, \theta = 10, n = 300$ . Median and robust standard deviations (in parentheses) of the MSE ratio between the penalized model and full model, and the estimated  $\theta$ . Mean and standard deviations of sensitivity and specificity.

| Method                | MSE                  | Sensitivity          | Specificity          | $\hat{\theta}$        |
|-----------------------|----------------------|----------------------|----------------------|-----------------------|
| <b>NB component</b>   |                      |                      |                      |                       |
| NB-LASSO              | 0.748 (0.4)          | 0.98 (0.098)         | 0.802 (0.077)        | 1.757 (0.398)         |
| NB-MCP                | 1.008 (0.69)         | 0.86 (0.247)         | 0.938 (0.057)        | 1.767 (0.394)         |
| NB-SCAD               | 1.048 (0.749)        | 0.85 (0.23)          | 0.937 (0.065)        | 1.745 (0.397)         |
| ZINB-LASSO            | 0.177 (0.116)        | <b>0.995</b> (0.05)  | 0.901 (0.073)        | 10.812 (4.071)        |
| ZINB-MCP              | <b>0.04</b> (0.039)  | 0.97 (0.119)         | 0.992 (0.02)         | 11.169 (4.962)        |
| ZINB-SCAD             | 0.042 (0.038)        | 0.975 (0.11)         | <b>0.994</b> (0.019) | <b>10.556</b> (4.192) |
| BE(0.1573)            | 0.559 (0.244)        | 0.985 (0.086)        | 0.763 (0.123)        | 14.539 (6.493)        |
| BE(0.05)              | 0.243 (0.291)        | 0.965 (0.128)        | 0.912 (0.077)        | 11.994 (4.838)        |
| BE(0.01)              | 0.044 (0.043)        | 0.96 (0.136)         | 0.98 (0.039)         | 11.472 (4.848)        |
| ZINB-ORACLE           | 0.029 (0.026)        | 1 (0)                | 1 (0)                | 10.761 (4.405)        |
| <b>Zero component</b> |                      |                      |                      |                       |
| ZINB-LASSO            | <b>0.176</b> (0.101) | 0.37 (0.247)         | 0.924 (0.067)        |                       |
| ZINB-MCP              | 0.214 (0.143)        | 0.51 (0.241)         | 0.909 (0.09)         |                       |
| ZINB-SCAD             | 0.229 (0.154)        | 0.342 (0.221)        | <b>0.965</b> (0.052) |                       |
| BE(0.1573)            | 0.591 (0.222)        | <b>0.568</b> (0.221) | 0.741 (0.133)        |                       |
| BE(0.05)              | 0.336 (0.206)        | 0.428 (0.211)        | 0.885 (0.077)        |                       |
| BE(0.01)              | 0.258 (0.155)        | 0.322 (0.202)        | 0.956 (0.055)        |                       |
| ZINB-ORACLE           | 0.041 (0.037)        | 1 (0)                | 1 (0)                |                       |

Table 15: Simulation results with example 3,  $\rho = 0.8, \theta = 10, n = 300$ . Median and robust standard deviations (in parentheses) of the MSE ratio between the penalized model and full model, and the estimated  $\theta$ . Mean and standard deviations of sensitivity and specificity.

| Method                | MSE                  | Sensitivity          | Specificity          | $\hat{\theta}$        |
|-----------------------|----------------------|----------------------|----------------------|-----------------------|
| <b>NB component</b>   |                      |                      |                      |                       |
| NB-LASSO              | 1.702 (0.816)        | 0.914 (0.19)         | 0.777 (0.096)        | 0.841 (0.194)         |
| NB-MCP                | 2.476 (1.298)        | 0.687 (0.3)          | 0.907 (0.057)        | 0.865 (0.194)         |
| NB-SCAD               | 2.517 (1.597)        | 0.682 (0.315)        | 0.908 (0.067)        | 0.865 (0.185)         |
| ZINB-LASSO            | 0.167 (0.125)        | <b>0.99</b> (0.071)  | 0.895 (0.069)        | 11.377 (4.945)        |
| ZINB-MCP              | 0.041 (0.047)        | 0.914 (0.215)        | 0.978 (0.039)        | 11.309 (5.182)        |
| ZINB-SCAD             | <b>0.038</b> (0.041) | 0.899 (0.226)        | <b>0.979</b> (0.038) | <b>10.779</b> (5.198) |
| BE(0.1573)            | 0.579 (0.291)        | 0.949 (0.151)        | 0.751 (0.136)        | 17.445 (11.205)       |
| BE(0.05)              | 0.308 (0.269)        | 0.949 (0.151)        | 0.903 (0.086)        | 14.059 (7.691)        |
| BE(0.01)              | 0.061 (0.077)        | 0.939 (0.164)        | 0.965 (0.056)        | 12.628 (5.458)        |
| ZINB-ORACLE           | 0.025 (0.022)        | 1 (0)                | 1 (0)                | 11.13 (5.059)         |
| <b>Zero component</b> |                      |                      |                      |                       |
| ZINB-LASSO            | <b>0.208</b> (0.125) | 0.462 (0.248)        | 0.926 (0.056)        |                       |
| ZINB-MCP              | 0.318 (0.229)        | 0.482 (0.258)        | 0.948 (0.055)        |                       |
| ZINB-SCAD             | 0.3 (0.211)          | 0.386 (0.235)        | <b>0.964</b> (0.047) |                       |
| BE(0.1573)            | 0.653 (0.179)        | <b>0.646</b> (0.247) | 0.751 (0.123)        |                       |
| BE(0.05)              | 0.437 (0.194)        | 0.523 (0.232)        | 0.887 (0.08)         |                       |
| BE(0.01)              | 0.354 (0.212)        | 0.417 (0.226)        | 0.949 (0.052)        |                       |
| ZINB-ORACLE           | 0.057 (0.049)        | 1 (0)                | 1 (0)                |                       |

Table 16: Simulation results with example 4,  $\rho = 0.8, \theta = 10, n = 300$ . Median and robust standard deviations (in parentheses) of the MSE ratio between the penalized model and full model, and the estimated  $\theta$ . Mean and standard deviations of sensitivity and specificity.

| Method                | MSE                  | Sensitivity          | Specificity          | $\hat{\theta}$        |
|-----------------------|----------------------|----------------------|----------------------|-----------------------|
| <b>NB component</b>   |                      |                      |                      |                       |
| NB-LASSO              | 2.637 (1.407)        | 0.316 (0.329)        | 0.911 (0.103)        | 0.947 (0.202)         |
| NB-MCP                | 2.684 (1.218)        | 0.495 (0.232)        | 0.903 (0.069)        | 1.098 (0.192)         |
| NB-SCAD               | 3.108 (1.61)         | 0.517 (0.257)        | 0.883 (0.086)        | 1.096 (0.182)         |
| ZINB-LASSO            | 1.277 (0.937)        | 0.773 (0.297)        | 0.839 (0.115)        | 8.839 (2.521)         |
| ZINB-MCP              | 0.5 (0.406)          | 0.867 (0.158)        | 0.945 (0.064)        | 11.54 (3.183)         |
| ZINB-SCAD             | 0.646 (0.571)        | 0.816 (0.196)        | 0.94 (0.068)         | <b>10.626</b> (3.185) |
| BE(0.1573)            | 0.698 (0.184)        | <b>0.947</b> (0.078) | 0.784 (0.131)        | 13.824 (5.319)        |
| BE(0.05)              | 0.506 (0.31)         | 0.923 (0.101)        | 0.895 (0.095)        | 12.391 (4.014)        |
| BE(0.01)              | <b>0.484</b> (0.435) | 0.862 (0.151)        | <b>0.959</b> (0.058) | 11.416 (3.308)        |
| ZINB-ORACLE           | 0.132 (0.099)        | 1 (0)                | 1 (0)                | 11.236 (2.911)        |
| <b>Zero component</b> |                      |                      |                      |                       |
| ZINB-LASSO            | <b>0.269</b> (0.156) | 0.333 (0.202)        | 0.91 (0.078)         |                       |
| ZINB-MCP              | 0.492 (0.239)        | 0.512 (0.236)        | 0.755 (0.136)        |                       |
| ZINB-SCAD             | 0.42 (0.215)         | 0.314 (0.177)        | 0.902 (0.085)        |                       |
| BE(0.1573)            | 0.724 (0.216)        | <b>0.582</b> (0.205) | 0.755 (0.107)        |                       |
| BE(0.05)              | 0.495 (0.277)        | 0.42 (0.189)         | 0.882 (0.075)        |                       |
| BE(0.01)              | 0.419 (0.234)        | 0.254 (0.166)        | <b>0.941</b> (0.057) |                       |
| ZINB-ORACLE           | 0.089 (0.052)        | 1 (0)                | 1 (0)                |                       |

Table 17: Simulation results with example 5,  $\rho = 0.8, \theta = 10, n = 300$ . Median and robust standard deviations (in parentheses) of the MSE ratio between the penalized model and full model, and the estimated  $\theta$ . Mean and standard deviations of sensitivity and specificity.

| Method                | MSE                  | Sensitivity         | Specificity          | $\hat{\theta}$        |
|-----------------------|----------------------|---------------------|----------------------|-----------------------|
| <b>NB component</b>   |                      |                     |                      |                       |
| NB-LASSO              | 1.639 (0.948)        | 0.995 (0.051)       | 0.793 (0.081)        | 1.382 (0.208)         |
| NB-MCP                | 0.988 (0.783)        | 0.98 (0.099)        | 0.94 (0.065)         | 1.382 (0.222)         |
| NB-SCAD               | 1.075 (0.753)        | 0.985 (0.087)       | 0.928 (0.079)        | 1.382 (0.221)         |
| ZINB-LASSO            | 0.467 (0.368)        | <b>1</b> (0)        | 0.936 (0.062)        | <b>10.235</b> (2.539) |
| ZINB-MCP              | 0.102 (0.103)        | 1 (0)               | 0.996 (0.014)        | 10.737 (2.59)         |
| ZINB-SCAD             | <b>0.079</b> (0.078) | 1 (0)               | <b>0.997</b> (0.012) | 10.842 (2.686)        |
| BE(0.1573)            | 0.587 (0.199)        | 1 (0)               | 0.789 (0.108)        | 12.877 (4.067)        |
| BE(0.05)              | 0.28 (0.23)          | 1 (0)               | 0.92 (0.073)         | 11.57 (3.467)         |
| BE(0.01)              | 0.119 (0.122)        | 1 (0)               | 0.981 (0.037)        | 10.841 (2.876)        |
| ZINB-ORACLE           | 0.071 (0.07)         | 1 (0)               | 1 (0)                | 10.821 (2.503)        |
| <b>Zero component</b> |                      |                     |                      |                       |
| ZINB-LASSO            | 0.63 (0.452)         | 0.645 (0.278)       | 0.939 (0.059)        |                       |
| ZINB-MCP              | <b>0.44</b> (0.358)  | 0.745 (0.224)       | 0.932 (0.066)        |                       |
| ZINB-SCAD             | 0.617 (0.376)        | 0.571 (0.243)       | <b>0.974</b> (0.035) |                       |
| BE(0.1573)            | 0.707 (0.299)        | <b>0.811</b> (0.18) | 0.789 (0.117)        |                       |
| BE(0.05)              | 0.625 (0.338)        | 0.686 (0.219)       | 0.914 (0.081)        |                       |
| BE(0.01)              | 0.671 (0.351)        | 0.528 (0.235)       | 0.971 (0.045)        |                       |
| ZINB-ORACLE           | 0.133 (0.081)        | 1 (0)               | 1 (0)                |                       |

Table 18: Simulation results with example 1,  $\rho = 0.4, \theta = 2, n = 100$ . Median and robust standard deviations (in parentheses) of the MSE ratio between the penalized model and full model, and the estimated  $\theta$ . Mean and standard deviations of sensitivity and specificity.

| Method                | MSE                  | Sensitivity          | Specificity          | $\hat{\theta}$       |
|-----------------------|----------------------|----------------------|----------------------|----------------------|
| <b>NB component</b>   |                      |                      |                      |                      |
| NB-LASSO              | 0.215 (0.135)        | 0.158 (0.292)        | <b>0.982</b> (0.037) | 0.242 (0.064)        |
| NB-MCP                | 0.382 (0.327)        | 0.332 (0.344)        | 0.931 (0.093)        | 0.292 (0.109)        |
| NB-SCAD               | 0.278 (0.225)        | 0.24 (0.339)         | 0.943 (0.109)        | 0.255 (0.088)        |
| ZINB-LASSO            | <b>0.063</b> (0.051) | 0.337 (0.405)        | 0.953 (0.082)        | <b>2.034</b> (1.436) |
| ZINB-MCP              | 0.111 (0.089)        | 0.418 (0.364)        | 0.933 (0.072)        | 3.396 (2.501)        |
| ZINB-SCAD             | 0.151 (0.15)         | 0.541 (0.364)        | 0.884 (0.099)        | 4.468 (4.165)        |
| BE(0.1573)            | 0.784 (0.201)        | <b>0.735</b> (0.282) | 0.428 (0.163)        | 2953523 (4378881)    |
| BE(0.05)              | 0.563 (0.283)        | 0.562 (0.33)         | 0.672 (0.201)        | 258 (381)            |
| BE(0.01)              | 0.185 (0.156)        | 0.406 (0.369)        | 0.903 (0.127)        | 4.334 (4.274)        |
| ZINB-ORACLE           | 0.023 (0.025)        | 1 (0)                | 1 (0)                | 2.945 (1.949)        |
| <b>Zero component</b> |                      |                      |                      |                      |
| ZINB-LASSO            | <b>8e-05</b> (1e-04) | 0.148 (0.179)        | <b>0.985</b> (0.036) |                      |
| ZINB-MCP              | 0.00025 (0.00035)    | 0.508 (0.245)        | 0.779 (0.2)          |                      |
| ZINB-SCAD             | 0.00017 (0.00023)    | 0.316 (0.22)         | 0.947 (0.079)        |                      |
| BE(0.1573)            | 0.36144 (0.48413)    | <b>0.551</b> (0.228) | 0.618 (0.193)        |                      |
| BE(0.05)              | 0.03615 (0.05347)    | 0.344 (0.268)        | 0.879 (0.12)         |                      |
| BE(0.01)              | 0.01967 (0.02907)    | 0.078 (0.118)        | 0.984 (0.035)        |                      |
| ZINB-ORACLE           | 6e-05 (8e-05)        | 1 (0)                | 1 (0)                |                      |

Table 19: Simulation results with example 2,  $\rho = 0.4, \theta = 2, n = 100$ . Median and robust standard deviations (in parentheses) of the MSE ratio between the penalized model and full model, and the estimated  $\theta$ . Mean and standard deviations of sensitivity and specificity.

| Method                | MSE                  | Sensitivity          | Specificity         | $\hat{\theta}$       |
|-----------------------|----------------------|----------------------|---------------------|----------------------|
| <b>NB component</b>   |                      |                      |                     |                      |
| NB-LASSO              | 0.341 (0.162)        | 0.486 (0.393)        | <b>0.963</b> (0.07) | 0.672 (0.183)        |
| NB-MCP                | 0.396 (0.24)         | 0.646 (0.379)        | 0.924 (0.084)       | 0.856 (0.324)        |
| NB-SCAD               | 0.374 (0.171)        | 0.583 (0.402)        | 0.914 (0.117)       | 0.779 (0.319)        |
| ZINB-LASSO            | <b>0.238</b> (0.142) | 0.521 (0.406)        | 0.961 (0.062)       | <b>2.909</b> (1.737) |
| ZINB-MCP              | 0.295 (0.199)        | 0.438 (0.402)        | 0.961 (0.057)       | 3.124 (1.758)        |
| ZINB-SCAD             | 0.283 (0.249)        | 0.743 (0.336)        | 0.878 (0.113)       | 4.628 (2.921)        |
| BE(0.1573)            | 0.867 (0.416)        | <b>0.811</b> (0.264) | 0.599 (0.192)       | 11.985 (11.849)      |
| BE(0.05)              | 0.526 (0.438)        | 0.708 (0.346)        | 0.794 (0.175)       | 5.703 (4.136)        |
| BE(0.01)              | 0.277 (0.296)        | 0.566 (0.367)        | 0.939 (0.113)       | 3.543 (2.508)        |
| ZINB-ORACLE           | 0.056 (0.045)        | 1 (0)                | 1 (0)               | 3.224 (1.833)        |
| <b>Zero component</b> |                      |                      |                     |                      |
| ZINB-LASSO            | <b>0.012</b> (0.018) | 0.194 (0.198)        | 0.97 (0.051)        |                      |
| ZINB-MCP              | 0.139 (0.205)        | <b>0.597</b> (0.267) | 0.612 (0.273)       |                      |
| ZINB-SCAD             | 0.045 (0.067)        | 0.292 (0.214)        | 0.902 (0.123)       |                      |
| BE(0.1573)            | 0.393 (0.381)        | 0.467 (0.235)        | 0.613 (0.167)       |                      |
| BE(0.05)              | 0.079 (0.117)        | 0.25 (0.235)         | 0.888 (0.114)       |                      |
| BE(0.01)              | 0.041 (0.06)         | 0.066 (0.122)        | <b>0.988</b> (0.03) |                      |
| ZINB-ORACLE           | 0.016 (0.023)        | 1 (0)                | 1 (0)               |                      |

Table 20: Simulation results with example 3,  $\rho = 0.4, \theta = 2, n = 100$ . Median and robust standard deviations (in parentheses) of the MSE ratio between the penalized model and full model, and the estimated  $\theta$ . Mean and standard deviations of sensitivity and specificity.

| Method                | MSE                  | Sensitivity          | Specificity          | $\hat{\theta}$       |
|-----------------------|----------------------|----------------------|----------------------|----------------------|
| <b>NB component</b>   |                      |                      |                      |                      |
| NB-LASSO              | 0.322 (0.161)        | 0.239 (0.363)        | <b>0.976</b> (0.056) | 0.389 (0.112)        |
| NB-MCP                | 0.419 (0.304)        | 0.438 (0.407)        | 0.929 (0.089)        | 0.501 (0.171)        |
| NB-SCAD               | 0.362 (0.187)        | 0.312 (0.403)        | 0.939 (0.102)        | 0.439 (0.141)        |
| ZINB-LASSO            | <b>0.131</b> (0.095) | 0.455 (0.426)        | 0.943 (0.108)        | <b>2.548</b> (1.673) |
| ZINB-MCP              | 0.201 (0.17)         | 0.449 (0.394)        | 0.932 (0.087)        | 3.258 (2.144)        |
| ZINB-SCAD             | 0.226 (0.218)        | 0.642 (0.347)        | 0.891 (0.106)        | 4.287 (2.851)        |
| BE(0.1573)            | 0.526 (0.381)        | <b>0.815</b> (0.3)   | 0.586 (0.171)        | 14.994 (17.361)      |
| BE(0.05)              | 0.339 (0.283)        | 0.712 (0.345)        | 0.775 (0.174)        | 8.39 (8.511)         |
| BE(0.01)              | 0.132 (0.138)        | 0.581 (0.368)        | 0.947 (0.085)        | 3.307 (2.31)         |
| ZINB-ORACLE           | 0.026 (0.022)        | 1 (0)                | 1 (0)                | 3.088 (1.742)        |
| <b>Zero component</b> |                      |                      |                      |                      |
| ZINB-LASSO            | <b>0.009</b> (0.014) | 0.179 (0.185)        | 0.968 (0.046)        |                      |
| ZINB-MCP              | 0.032 (0.047)        | 0.528 (0.269)        | 0.756 (0.223)        |                      |
| ZINB-SCAD             | 0.017 (0.025)        | 0.27 (0.212)         | 0.927 (0.082)        |                      |
| BE(0.1573)            | 0.113 (0.167)        | <b>0.562</b> (0.264) | 0.639 (0.177)        |                      |
| BE(0.05)              | 0.024 (0.035)        | 0.281 (0.262)        | 0.895 (0.125)        |                      |
| BE(0.01)              | 0.014 (0.02)         | 0.072 (0.121)        | <b>0.995</b> (0.018) |                      |
| ZINB-ORACLE           | 0.004 (0.006)        | 1 (0)                | 1 (0)                |                      |

Table 21: Simulation results with example 4,  $\rho = 0.4, \theta = 2, n = 100$ . Median and robust standard deviations (in parentheses) of the MSE ratio between the penalized model and full model, and the estimated  $\theta$ . Mean and standard deviations of sensitivity and specificity.

| Method                | MSE                  | Sensitivity          | Specificity          | $\hat{\theta}$       |
|-----------------------|----------------------|----------------------|----------------------|----------------------|
| <b>NB component</b>   |                      |                      |                      |                      |
| NB-LASSO              | 0.751 (0.432)        | 0.177 (0.19)         | <b>0.967</b> (0.059) | 0.507 (0.112)        |
| NB-MCP                | 0.966 (0.568)        | 0.336 (0.284)        | 0.932 (0.088)        | 0.565 (0.155)        |
| NB-SCAD               | 0.885 (0.616)        | 0.271 (0.264)        | 0.937 (0.1)          | 0.547 (0.171)        |
| ZINB-LASSO            | <b>0.606</b> (0.277) | 0.246 (0.316)        | 0.952 (0.095)        | <b>1.917</b> (0.823) |
| ZINB-MCP              | 0.662 (0.352)        | 0.303 (0.284)        | 0.951 (0.063)        | 2.498 (1.139)        |
| ZINB-SCAD             | 0.683 (0.405)        | 0.463 (0.285)        | 0.886 (0.103)        | 3.389 (1.866)        |
| BE(0.1573)            | 0.824 (0.391)        | <b>0.707</b> (0.243) | 0.648 (0.174)        | 5.806 (2.842)        |
| BE(0.05)              | 0.704 (0.408)        | 0.558 (0.3)          | 0.812 (0.14)         | 4.462 (2.095)        |
| BE(0.01)              | 0.666 (0.497)        | 0.369 (0.303)        | 0.951 (0.074)        | 2.894 (1.301)        |
| ZINB-ORACLE           | 0.161 (0.111)        | 1 (0)                | 1 (0)                | 3.263 (0.966)        |
| <b>Zero component</b> |                      |                      |                      |                      |
| ZINB-LASSO            | <b>0.036</b> (0.051) | 0.168 (0.137)        | 0.962 (0.081)        |                      |
| ZINB-MCP              | 0.205 (0.252)        | <b>0.506</b> (0.238) | 0.691 (0.238)        |                      |
| ZINB-SCAD             | 0.095 (0.124)        | 0.257 (0.173)        | 0.92 (0.096)         |                      |
| BE(0.1573)            | 0.337 (0.316)        | 0.485 (0.224)        | 0.653 (0.182)        |                      |
| BE(0.05)              | 0.096 (0.137)        | 0.274 (0.224)        | 0.903 (0.107)        |                      |
| BE(0.01)              | 0.041 (0.059)        | 0.069 (0.101)        | <b>0.992</b> (0.022) |                      |
| ZINB-ORACLE           | 0.041 (0.055)        | 1 (0)                | 1 (0)                |                      |

Table 22: Simulation results with example 5,  $\rho = 0.4, \theta = 2, n = 100$ . Median and robust standard deviations (in parentheses) of the MSE ratio between the penalized model and full model, and the estimated  $\theta$ . Mean and standard deviations of sensitivity and specificity.

| Method                | MSE                  | Sensitivity         | Specificity          | $\hat{\theta}$       |
|-----------------------|----------------------|---------------------|----------------------|----------------------|
| <b>NB component</b>   |                      |                     |                      |                      |
| NB-LASSO              | 1.181 (0.788)        | 0.394 (0.387)       | <b>0.977</b> (0.045) | 0.595 (0.139)        |
| NB-MCP                | 0.97 (0.753)         | 0.563 (0.387)       | 0.945 (0.076)        | 0.678 (0.202)        |
| NB-SCAD               | 1.059 (0.85)         | 0.472 (0.413)       | 0.953 (0.072)        | 0.625 (0.178)        |
| ZINB-LASSO            | 0.761 (0.602)        | 0.451 (0.407)       | 0.961 (0.07)         | <b>2.289</b> (1.057) |
| ZINB-MCP              | 0.497 (0.397)        | 0.592 (0.381)       | 0.964 (0.056)        | 2.421 (1.056)        |
| ZINB-SCAD             | 0.517 (0.483)        | 0.697 (0.363)       | 0.916 (0.097)        | 3.022 (1.432)        |
| BE(0.1573)            | 0.696 (0.241)        | <b>0.887</b> (0.21) | 0.668 (0.119)        | 5.227 (2.702)        |
| BE(0.05)              | 0.508 (0.305)        | 0.796 (0.288)       | 0.845 (0.11)         | 4.071 (1.819)        |
| BE(0.01)              | <b>0.466</b> (0.472) | 0.613 (0.38)        | 0.962 (0.057)        | 2.644 (1.388)        |
| ZINB-ORACLE           | 0.084 (0.077)        | 1 (0)               | 1 (0)                | 2.712 (1.01)         |
| <b>Zero component</b> |                      |                     |                      |                      |
| ZINB-LASSO            | <b>0.194</b> (0.237) | 0.165 (0.215)       | 0.969 (0.046)        |                      |
| ZINB-MCP              | 0.424 (0.469)        | <b>0.57</b> (0.247) | 0.691 (0.197)        |                      |
| ZINB-SCAD             | 0.282 (0.279)        | 0.285 (0.244)       | 0.934 (0.078)        |                      |
| BE(0.1573)            | 0.502 (0.384)        | 0.535 (0.275)       | 0.727 (0.14)         |                      |
| BE(0.05)              | 0.293 (0.325)        | 0.289 (0.23)        | 0.924 (0.095)        |                      |
| BE(0.01)              | 0.257 (0.277)        | 0.081 (0.151)       | <b>0.987</b> (0.03)  |                      |
| ZINB-ORACLE           | 0.087 (0.105)        | 1 (0)               | 1 (0)                |                      |

Table 23: Simulation results with example 1,  $\rho = 0.8, \theta = 2, n = 100$ . Median and robust standard deviations (in parentheses) of the MSE ratio between the penalized model and full model, and the estimated  $\theta$ . Mean and standard deviations of sensitivity and specificity.

| Method                | MSE                  | Sensitivity          | Specificity          | $\hat{\theta}$       |
|-----------------------|----------------------|----------------------|----------------------|----------------------|
| <b>NB component</b>   |                      |                      |                      |                      |
| NB-LASSO              | 0.114 (0.075)        | 0.215 (0.335)        | 0.921 (0.089)        | 0.3 (0.131)          |
| NB-MCP                | 0.22 (0.134)         | 0.24 (0.28)          | 0.917 (0.061)        | 0.366 (0.112)        |
| NB-SCAD               | 0.233 (0.147)        | 0.22 (0.304)         | 0.888 (0.084)        | 0.368 (0.117)        |
| ZINB-LASSO            | <b>0.033</b> (0.027) | 0.37 (0.393)         | 0.913 (0.088)        | <b>2.649</b> (1.727) |
| ZINB-MCP              | 0.047 (0.042)        | 0.295 (0.334)        | <b>0.932</b> (0.076) | 3.084 (2.1)          |
| ZINB-SCAD             | 0.06 (0.059)         | 0.34 (0.347)         | 0.909 (0.077)        | 3.562 (2.713)        |
| BE(0.1573)            | 0.205 (0.279)        | <b>0.638</b> (0.298) | 0.565 (0.178)        | 13.179 (15.833)      |
| BE(0.05)              | 0.089 (0.107)        | 0.467 (0.322)        | 0.731 (0.174)        | 6.404 (6.105)        |
| BE(0.01)              | 0.059 (0.053)        | 0.295 (0.282)        | 0.903 (0.127)        | 2.902 (1.611)        |
| ZINB-ORACLE           | 0.007 (0.007)        | 1 (0)                | 1 (0)                | 2.565 (1.307)        |
| <b>Zero component</b> |                      |                      |                      |                      |
| ZINB-LASSO            | <b>6e-05</b> (8e-05) | 0.14 (0.192)         | 0.969 (0.04)         |                      |
| ZINB-MCP              | 5e-04 (0.00073)      | 0.358 (0.242)        | 0.877 (0.11)         |                      |
| ZINB-SCAD             | 0.00033 (0.00048)    | 0.185 (0.183)        | 0.957 (0.055)        |                      |
| BE(0.1573)            | 0.00479 (0.00708)    | <b>0.482</b> (0.246) | 0.609 (0.188)        |                      |
| BE(0.05)              | 0.00035 (0.00051)    | 0.247 (0.206)        | 0.87 (0.145)         |                      |
| BE(0.01)              | 8e-05 (0.00012)      | 0.084 (0.124)        | <b>0.98</b> (0.037)  |                      |
| ZINB-ORACLE           | 7e-05 (0.00011)      | 1 (0)                | 1 (0)                |                      |

Table 24: Simulation results with example 2,  $\rho = 0.8, \theta = 2, n = 100$ . Median and robust standard deviations (in parentheses) of the MSE ratio between the penalized model and full model, and the estimated  $\theta$ . Mean and standard deviations of sensitivity and specificity.

| Method                | MSE                  | Sensitivity          | Specificity          | $\hat{\theta}$       |
|-----------------------|----------------------|----------------------|----------------------|----------------------|
| <b>NB component</b>   |                      |                      |                      |                      |
| NB-LASSO              | 0.136 (0.085)        | 0.488 (0.377)        | 0.901 (0.094)        | 0.778 (0.281)        |
| NB-MCP                | 0.237 (0.185)        | 0.494 (0.356)        | 0.92 (0.067)         | 0.927 (0.286)        |
| NB-SCAD               | 0.252 (0.183)        | 0.518 (0.355)        | 0.902 (0.076)        | 0.959 (0.29)         |
| ZINB-LASSO            | <b>0.094</b> (0.068) | 0.494 (0.404)        | 0.907 (0.087)        | 3.095 (1.915)        |
| ZINB-MCP              | 0.12 (0.107)         | 0.348 (0.374)        | <b>0.944</b> (0.071) | <b>2.828</b> (1.698) |
| ZINB-SCAD             | 0.139 (0.122)        | 0.451 (0.357)        | 0.907 (0.089)        | 3.967 (2.237)        |
| BE(0.1573)            | 0.768 (0.401)        | <b>0.628</b> (0.321) | 0.592 (0.134)        | 11.055 (11.739)      |
| BE(0.05)              | 0.395 (0.313)        | 0.472 (0.355)        | 0.757 (0.145)        | 5.886 (4.9)          |
| BE(0.01)              | 0.193 (0.143)        | 0.299 (0.297)        | 0.91 (0.11)          | 3.399 (2.049)        |
| ZINB-ORACLE           | 0.018 (0.019)        | 1 (0)                | 1 (0)                | 3.095 (1.461)        |
| <b>Zero component</b> |                      |                      |                      |                      |
| ZINB-LASSO            | <b>0.003</b> (0.005) | 0.171 (0.204)        | 0.959 (0.048)        |                      |
| ZINB-MCP              | 0.044 (0.065)        | 0.393 (0.302)        | 0.748 (0.216)        |                      |
| ZINB-SCAD             | 0.011 (0.016)        | 0.216 (0.207)        | 0.927 (0.095)        |                      |
| BE(0.1573)            | 0.168 (0.249)        | <b>0.437</b> (0.254) | 0.618 (0.195)        |                      |
| BE(0.05)              | 0.007 (0.01)         | 0.235 (0.205)        | 0.865 (0.158)        |                      |
| BE(0.01)              | 0.005 (0.007)        | 0.073 (0.11)         | <b>0.978</b> (0.039) |                      |
| ZINB-ORACLE           | 0.002 (0.002)        | 1 (0)                | 1 (0)                |                      |

Table 25: Simulation results with example 3,  $\rho = 0.8, \theta = 2, n = 100$ . Median and robust standard deviations (in parentheses) of the MSE ratio between the penalized model and full model, and the estimated  $\theta$ . Mean and standard deviations of sensitivity and specificity.

| Method                | MSE                  | Sensitivity          | Specificity          | $\hat{\theta}$       |
|-----------------------|----------------------|----------------------|----------------------|----------------------|
| <b>NB component</b>   |                      |                      |                      |                      |
| NB-LASSO              | 0.139 (0.095)        | 0.34 (0.388)         | 0.909 (0.094)        | 0.472 (0.158)        |
| NB-MCP                | 0.275 (0.215)        | 0.31 (0.347)         | 0.913 (0.065)        | 0.569 (0.162)        |
| NB-SCAD               | 0.276 (0.241)        | 0.32 (0.352)         | 0.893 (0.084)        | 0.566 (0.179)        |
| ZINB-LASSO            | <b>0.05</b> (0.031)  | 0.405 (0.425)        | 0.912 (0.089)        | <b>3.207</b> (2.163) |
| ZINB-MCP              | 0.089 (0.067)        | 0.26 (0.297)         | <b>0.934</b> (0.063) | 3.297 (2.422)        |
| ZINB-SCAD             | 0.112 (0.104)        | 0.36 (0.318)         | 0.898 (0.079)        | 4.041 (2.734)        |
| BE(0.1573)            | 0.708 (0.426)        | <b>0.623</b> (0.342) | 0.549 (0.151)        | 13.682 (16.157)      |
| BE(0.05)              | 0.273 (0.282)        | 0.458 (0.373)        | 0.748 (0.157)        | 8.268 (8.239)        |
| BE(0.01)              | 0.134 (0.124)        | 0.29 (0.336)         | 0.884 (0.119)        | 4.084 (3.066)        |
| ZINB-ORACLE           | 0.015 (0.013)        | 1 (0)                | 1 (0)                | 2.893 (1.553)        |
| <b>Zero component</b> |                      |                      |                      |                      |
| ZINB-LASSO            | <b>0.002</b> (0.003) | 0.162 (0.211)        | 0.956 (0.064)        |                      |
| ZINB-MCP              | 0.01 (0.015)         | 0.338 (0.289)        | 0.844 (0.171)        |                      |
| ZINB-SCAD             | 0.007 (0.01)         | 0.145 (0.16)         | 0.931 (0.095)        |                      |
| BE(0.1573)            | 0.063 (0.094)        | <b>0.458</b> (0.245) | 0.591 (0.193)        |                      |
| BE(0.05)              | 0.006 (0.009)        | 0.231 (0.203)        | 0.855 (0.148)        |                      |
| BE(0.01)              | 0.003 (0.004)        | 0.076 (0.112)        | <b>0.973</b> (0.041) |                      |
| ZINB-ORACLE           | 0.001 (0.002)        | 1 (0)                | 1 (0)                |                      |

Table 26: Simulation results with example 4,  $\rho = 0.8, \theta = 2, n = 100$ . Median and robust standard deviations (in parentheses) of the MSE ratio between the penalized model and full model, and the estimated  $\theta$ . Mean and standard deviations of sensitivity and specificity.

| Method                | MSE                  | Sensitivity          | Specificity          | $\hat{\theta}$       |
|-----------------------|----------------------|----------------------|----------------------|----------------------|
| <b>NB component</b>   |                      |                      |                      |                      |
| NB-LASSO              | 0.252 (0.13)         | 0.072 (0.092)        | <b>0.957</b> (0.047) | 0.587 (0.128)        |
| NB-MCP                | 0.399 (0.266)        | 0.153 (0.167)        | 0.926 (0.059)        | 0.667 (0.153)        |
| NB-SCAD               | 0.385 (0.253)        | 0.155 (0.18)         | 0.919 (0.095)        | 0.656 (0.166)        |
| ZINB-LASSO            | <b>0.214</b> (0.09)  | 0.102 (0.16)         | 0.95 (0.075)         | <b>2.122</b> (0.985) |
| ZINB-MCP              | 0.245 (0.145)        | 0.12 (0.14)          | 0.929 (0.071)        | 2.639 (1.188)        |
| ZINB-SCAD             | 0.308 (0.178)        | 0.181 (0.17)         | 0.902 (0.095)        | 2.761 (1.322)        |
| BE(0.1573)            | 0.758 (0.277)        | <b>0.537</b> (0.233) | 0.595 (0.138)        | 6.067 (3.976)        |
| BE(0.05)              | 0.498 (0.311)        | 0.354 (0.271)        | 0.775 (0.137)        | 4.581 (2.518)        |
| BE(0.01)              | 0.297 (0.21)         | 0.183 (0.215)        | 0.916 (0.105)        | 2.775 (1.25)         |
| ZINB-ORACLE           | 0.086 (0.071)        | 1 (0)                | 1 (0)                | 3.07 (1.109)         |
| <b>Zero component</b> |                      |                      |                      |                      |
| ZINB-LASSO            | <b>0.017</b> (0.023) | 0.062 (0.106)        | <b>0.969</b> (0.051) |                      |
| ZINB-MCP              | 0.14 (0.167)         | 0.366 (0.214)        | 0.707 (0.176)        |                      |
| ZINB-SCAD             | 0.043 (0.049)        | 0.134 (0.142)        | 0.926 (0.071)        |                      |
| BE(0.1573)            | 0.354 (0.36)         | <b>0.44</b> (0.215)  | 0.653 (0.151)        |                      |
| BE(0.05)              | 0.106 (0.144)        | 0.238 (0.159)        | 0.852 (0.122)        |                      |
| BE(0.01)              | 0.031 (0.039)        | 0.06 (0.103)         | 0.965 (0.053)        |                      |
| ZINB-ORACLE           | 0.018 (0.026)        | 1 (0)                | 1 (0)                |                      |

Table 27: Simulation results with example 5,  $\rho = 0.8, \theta = 2, n = 100$ . Median and robust standard deviations (in parentheses) of the MSE ratio between the penalized model and full model, and the estimated  $\theta$ . Mean and standard deviations of sensitivity and specificity.

| Method                | MSE                  | Sensitivity          | Specificity          | $\hat{\theta}$       |
|-----------------------|----------------------|----------------------|----------------------|----------------------|
| <b>NB component</b>   |                      |                      |                      |                      |
| NB-LASSO              | 0.483 (0.306)        | 0.529 (0.439)        | 0.914 (0.082)        | 0.672 (0.186)        |
| NB-MCP                | 0.583 (0.499)        | 0.547 (0.359)        | 0.924 (0.057)        | 0.741 (0.135)        |
| NB-SCAD               | 0.552 (0.507)        | 0.576 (0.397)        | 0.907 (0.075)        | 0.737 (0.157)        |
| ZINB-LASSO            | <b>0.253</b> (0.21)  | 0.676 (0.421)        | 0.914 (0.073)        | <b>2.647</b> (1.052) |
| ZINB-MCP              | 0.376 (0.272)        | 0.518 (0.366)        | 0.948 (0.063)        | 2.711 (1.166)        |
| ZINB-SCAD             | 0.324 (0.324)        | 0.641 (0.35)         | 0.917 (0.087)        | 3.125 (1.132)        |
| BE(0.1573)            | 0.68 (0.391)         | <b>0.841</b> (0.247) | 0.646 (0.153)        | 4.82 (1.94)          |
| BE(0.05)              | 0.35 (0.307)         | 0.747 (0.305)        | 0.835 (0.119)        | 3.83 (1.611)         |
| BE(0.01)              | 0.323 (0.33)         | 0.618 (0.359)        | <b>0.949</b> (0.064) | 3.046 (1.374)        |
| ZINB-ORACLE           | 0.047 (0.047)        | 1 (0)                | 1 (0)                | 2.61 (0.771)         |
| <b>Zero component</b> |                      |                      |                      |                      |
| ZINB-LASSO            | <b>0.052</b> (0.067) | 0.224 (0.211)        | 0.951 (0.059)        |                      |
| ZINB-MCP              | 0.155 (0.176)        | <b>0.479</b> (0.242) | 0.796 (0.163)        |                      |
| ZINB-SCAD             | 0.107 (0.121)        | 0.244 (0.222)        | 0.943 (0.07)         |                      |
| BE(0.1573)            | 0.42 (0.388)         | 0.465 (0.256)        | 0.665 (0.181)        |                      |
| BE(0.05)              | 0.134 (0.167)        | 0.25 (0.208)         | 0.899 (0.12)         |                      |
| BE(0.01)              | 0.077 (0.093)        | 0.091 (0.144)        | <b>0.981</b> (0.033) |                      |
| ZINB-ORACLE           | 0.029 (0.035)        | 1 (0)                | 1 (0)                |                      |



Table 28: Simulation results with example 1,  $\rho = 0.4, \theta = 10, n = 100$ . Median and robust standard deviations (in parentheses) of the MSE ratio between the penalized model and full model, and the estimated  $\theta$ . Mean and standard deviations of sensitivity and specificity.

| Method                | MSE                  | Sensitivity          | Specificity          | $\hat{\theta}$         |
|-----------------------|----------------------|----------------------|----------------------|------------------------|
| <b>NB component</b>   |                      |                      |                      |                        |
| NB-LASSO              | 0.429 (0.219)        | 0.247 (0.362)        | <b>0.966</b> (0.065) | 0.344 (0.104)          |
| NB-MCP                | 0.573 (0.399)        | 0.371 (0.391)        | 0.924 (0.101)        | 0.443 (0.19)           |
| NB-SCAD               | 0.516 (0.357)        | 0.34 (0.392)         | 0.923 (0.113)        | 0.386 (0.168)          |
| ZINB-LASSO            | <b>0.071</b> (0.06)  | 0.593 (0.429)        | 0.95 (0.067)         | <b>12.587</b> (13.361) |
| ZINB-MCP              | 0.083 (0.088)        | 0.603 (0.414)        | 0.956 (0.054)        | 23.035 (28.778)        |
| ZINB-SCAD             | 0.099 (0.092)        | 0.716 (0.353)        | 0.926 (0.078)        | 34.95 (42.79)          |
| BE(0.1573)            | 0.694 (0.412)        | <b>0.806</b> (0.275) | 0.6 (0.201)          | 1589894 (2357156)      |
| BE(0.05)              | 0.249 (0.192)        | 0.735 (0.353)        | 0.845 (0.152)        | 316624 (469402)        |
| BE(0.01)              | 0.177 (0.193)        | 0.559 (0.404)        | 0.958 (0.068)        | 30.367 (34.407)        |
| ZINB-ORACLE           | 0.015 (0.018)        | 1 (0)                | 1 (0)                | 20.829 (24.069)        |
| <b>Zero component</b> |                      |                      |                      |                        |
| ZINB-LASSO            | <b>5e-05</b> (5e-05) | 0.253 (0.23)         | 0.978 (0.035)        |                        |
| ZINB-MCP              | 0.00023 (0.00033)    | 0.564 (0.256)        | 0.809 (0.173)        |                        |
| ZINB-SCAD             | 0.00011 (0.00015)    | 0.348 (0.241)        | 0.949 (0.065)        |                        |
| BE(0.1573)            | 0.11708 (0.16425)    | <b>0.604</b> (0.289) | 0.66 (0.172)         |                        |
| BE(0.05)              | 0.02478 (0.03663)    | 0.39 (0.262)         | 0.901 (0.123)        |                        |
| BE(0.01)              | 0.01368 (0.02018)    | 0.176 (0.18)         | <b>0.993</b> (0.02)  |                        |
| ZINB-ORACLE           | 3e-05 (5e-05)        | 1 (0)                | 1 (0)                |                        |

Table 29: Simulation results with example 2,  $\rho = 0.4, \theta = 10, n = 100$ . Median and robust standard deviations (in parentheses) of the MSE ratio between the penalized model and full model, and the estimated  $\theta$ . Mean and standard deviations of sensitivity and specificity.

| Method                | MSE                  | Sensitivity          | Specificity          | $\hat{\theta}$         |
|-----------------------|----------------------|----------------------|----------------------|------------------------|
| <b>NB component</b>   |                      |                      |                      |                        |
| NB-LASSO              | 0.525 (0.285)        | 0.73 (0.354)         | 0.941 (0.079)        | 1.395 (0.594)          |
| NB-MCP                | 0.601 (0.404)        | 0.792 (0.318)        | 0.941 (0.079)        | 1.588 (0.785)          |
| NB-SCAD               | 0.616 (0.386)        | 0.758 (0.346)        | 0.918 (0.107)        | 1.546 (0.825)          |
| ZINB-LASSO            | 0.2 (0.171)          | 0.798 (0.351)        | 0.94 (0.083)         | <b>13.543</b> (12.434) |
| ZINB-MCP              | 0.211 (0.239)        | 0.77 (0.346)         | <b>0.968</b> (0.057) | 14.248 (13.997)        |
| ZINB-SCAD             | <b>0.175</b> (0.2)   | <b>0.893</b> (0.219) | 0.927 (0.085)        | 16.574 (16.775)        |
| BE(0.1573)            | 0.792 (0.368)        | 0.887 (0.233)        | 0.646 (0.172)        | 557352 (826283)        |
| BE(0.05)              | 0.272 (0.351)        | 0.853 (0.27)         | 0.87 (0.138)         | 16568 (24551)          |
| BE(0.01)              | 0.186 (0.248)        | 0.745 (0.366)        | 0.966 (0.06)         | 17.989 (18.842)        |
| ZINB-ORACLE           | 0.048 (0.045)        | 1 (0)                | 1 (0)                | 18.609 (16.618)        |
| <b>Zero component</b> |                      |                      |                      |                        |
| ZINB-LASSO            | <b>4e-05</b> (4e-05) | 0.289 (0.264)        | 0.945 (0.073)        |                        |
| ZINB-MCP              | 0.05664 (0.08392)    | <b>0.66</b> (0.248)  | 0.563 (0.298)        |                        |
| ZINB-SCAD             | 0.00218 (0.00318)    | 0.365 (0.261)        | 0.899 (0.119)        |                        |
| BE(0.1573)            | 0.00587 (0.00866)    | 0.566 (0.269)        | 0.685 (0.171)        |                        |
| BE(0.05)              | 0.00036 (0.00051)    | 0.284 (0.265)        | 0.907 (0.128)        |                        |
| BE(0.01)              | 5e-05 (5e-05)        | 0.083 (0.147)        | <b>0.994</b> (0.023) |                        |
| ZINB-ORACLE           | 5e-05 (6e-05)        | 1 (0)                | 1 (0)                |                        |

Table 30: Simulation results with example 3,  $\rho = 0.4, \theta = 10, n = 100$ . Median and robust standard deviations (in parentheses) of the MSE ratio between the penalized model and full model, and the estimated  $\theta$ . Mean and standard deviations of sensitivity and specificity.

| Method                | MSE                  | Sensitivity          | Specificity          | $\hat{\theta}$         |
|-----------------------|----------------------|----------------------|----------------------|------------------------|
| <b>NB component</b>   |                      |                      |                      |                        |
| NB-LASSO              | 0.551 (0.312)        | 0.438 (0.422)        | 0.944 (0.086)        | 0.607 (0.195)          |
| NB-MCP                | 0.713 (0.527)        | 0.567 (0.379)        | 0.911 (0.094)        | 0.79 (0.311)           |
| NB-SCAD               | 0.692 (0.51)         | 0.536 (0.403)        | 0.891 (0.125)        | 0.74 (0.325)           |
| ZINB-LASSO            | 0.145 (0.128)        | 0.737 (0.383)        | 0.94 (0.077)         | 17.123 (17.926)        |
| ZINB-MCP              | 0.131 (0.148)        | 0.665 (0.393)        | <b>0.966</b> (0.058) | <b>15.876</b> (18.774) |
| ZINB-SCAD             | 0.143 (0.167)        | 0.835 (0.286)        | 0.914 (0.097)        | 28.343 (32.342)        |
| BE(0.1573)            | 0.533 (0.397)        | <b>0.888</b> (0.225) | 0.632 (0.177)        | 795841 (1179852)       |
| BE(0.05)              | 0.243 (0.255)        | 0.827 (0.291)        | 0.853 (0.127)        | 21268 (31529)          |
| BE(0.01)              | <b>0.096</b> (0.121) | 0.733 (0.352)        | 0.966 (0.053)        | 24.578 (27.685)        |
| ZINB-ORACLE           | 0.03 (0.022)         | 1 (0)                | 1 (0)                | 23.858 (24.497)        |
| <b>Zero component</b> |                      |                      |                      |                        |
| ZINB-LASSO            | <b>4e-05</b> (4e-05) | 0.284 (0.249)        | 0.963 (0.05)         |                        |
| ZINB-MCP              | 0.00026 (0.00037)    | <b>0.631</b> (0.258) | 0.771 (0.204)        |                        |
| ZINB-SCAD             | 0.00012 (0.00016)    | 0.407 (0.248)        | 0.93 (0.086)         |                        |
| BE(0.1573)            | 0.00466 (0.00686)    | 0.553 (0.266)        | 0.651 (0.182)        |                        |
| BE(0.05)              | 0.00101 (0.00148)    | 0.337 (0.262)        | 0.891 (0.144)        |                        |
| BE(0.01)              | 7e-05 (9e-05)        | 0.123 (0.171)        | <b>0.991</b> (0.028) |                        |
| ZINB-ORACLE           | 3e-05 (5e-05)        | 1 (0)                | 1 (0)                |                        |

Table 31: Simulation results with example 4,  $\rho = 0.4, \theta = 10, n = 100$ . Median and robust standard deviations (in parentheses) of the MSE ratio between the penalized model and full model, and the estimated  $\theta$ . Mean and standard deviations of sensitivity and specificity.

| Method                | MSE                  | Sensitivity          | Specificity          | $\hat{\theta}$         |
|-----------------------|----------------------|----------------------|----------------------|------------------------|
| <b>NB component</b>   |                      |                      |                      |                        |
| NB-LASSO              | 1.677 (0.741)        | 0.208 (0.222)        | <b>0.967</b> (0.068) | 0.719 (0.181)          |
| NB-MCP                | 1.721 (0.915)        | 0.418 (0.294)        | 0.929 (0.079)        | 0.966 (0.448)          |
| NB-SCAD               | 1.829 (0.971)        | 0.374 (0.323)        | 0.925 (0.107)        | 0.854 (0.386)          |
| ZINB-LASSO            | 0.955 (0.837)        | 0.474 (0.416)        | 0.916 (0.118)        | 5.382 (4.92)           |
| ZINB-MCP              | 0.696 (0.481)        | 0.61 (0.354)         | 0.937 (0.088)        | <b>10.523</b> (10.614) |
| ZINB-SCAD             | 0.579 (0.365)        | 0.79 (0.264)         | 0.877 (0.114)        | 14.193 (12.419)        |
| BE(0.1573)            | 0.734 (0.272)        | <b>0.896</b> (0.154) | 0.698 (0.161)        | 75.515 (100)           |
| BE(0.05)              | <b>0.467</b> (0.333) | 0.838 (0.194)        | 0.887 (0.11)         | 33.711 (37.303)        |
| BE(0.01)              | 0.553 (0.408)        | 0.68 (0.279)         | 0.954 (0.076)        | 17.989 (17.228)        |
| ZINB-ORACLE           | 0.144 (0.101)        | 1 (0)                | 1 (0)                | 16.072 (10.147)        |
| <b>Zero component</b> |                      |                      |                      |                        |
| ZINB-LASSO            | <b>0.052</b> (0.076) | 0.19 (0.173)         | 0.963 (0.063)        |                        |
| ZINB-MCP              | 0.264 (0.377)        | <b>0.604</b> (0.233) | 0.625 (0.248)        |                        |
| ZINB-SCAD             | 0.121 (0.168)        | 0.251 (0.211)        | 0.91 (0.102)         |                        |
| BE(0.1573)            | 0.437 (0.403)        | 0.518 (0.241)        | 0.719 (0.172)        |                        |
| BE(0.05)              | 0.128 (0.179)        | 0.274 (0.243)        | 0.924 (0.089)        |                        |
| BE(0.01)              | 0.092 (0.127)        | 0.07 (0.11)          | <b>0.982</b> (0.041) |                        |
| ZINB-ORACLE           | 0.039 (0.058)        | 1 (0)                | 1 (0)                |                        |

Table 32: Simulation results with example 5,  $\rho = 0.4, \theta = 10, n = 100$ . Median and robust standard deviations (in parentheses) of the MSE ratio between the penalized model and full model, and the estimated  $\theta$ . Mean and standard deviations of sensitivity and specificity.

| Method                | MSE                  | Sensitivity          | Specificity          | $\hat{\theta}$        |
|-----------------------|----------------------|----------------------|----------------------|-----------------------|
| <b>NB component</b>   |                      |                      |                      |                       |
| NB-LASSO              | 2.311 (1.797)        | 0.704 (0.386)        | 0.954 (0.068)        | 1.081 (0.405)         |
| NB-MCP                | 1.498 (1.382)        | 0.796 (0.324)        | 0.938 (0.084)        | 1.284 (0.467)         |
| NB-SCAD               | 1.937 (1.837)        | 0.753 (0.363)        | 0.928 (0.091)        | 1.134 (0.465)         |
| ZINB-LASSO            | 0.481 (0.362)        | 0.969 (0.165)        | 0.916 (0.076)        | <b>15.013</b> (9.881) |
| ZINB-MCP              | 0.321 (0.309)        | 0.963 (0.173)        | <b>0.971</b> (0.047) | 15.48 (10.393)        |
| ZINB-SCAD             | 0.261 (0.22)         | <b>1</b> (0)         | 0.922 (0.078)        | 16.044 (8.899)        |
| BE(0.1573)            | 0.679 (0.334)        | 0.969 (0.1)          | 0.696 (0.155)        | 307 (443)             |
| BE(0.05)              | 0.332 (0.27)         | 0.96 (0.11)          | 0.9 (0.092)          | 26.894 (24.716)       |
| BE(0.01)              | <b>0.213</b> (0.203) | 0.915 (0.195)        | 0.963 (0.065)        | 17.511 (11.689)       |
| ZINB-ORACLE           | 0.097 (0.106)        | 1 (0)                | 1 (0)                | 14.512 (8.938)        |
| <b>Zero component</b> |                      |                      |                      |                       |
| ZINB-LASSO            | <b>0.111</b> (0.162) | 0.401 (0.226)        | 0.943 (0.075)        |                       |
| ZINB-MCP              | 0.362 (0.436)        | <b>0.704</b> (0.227) | 0.633 (0.207)        |                       |
| ZINB-SCAD             | 0.122 (0.18)         | 0.398 (0.219)        | 0.934 (0.075)        |                       |
| BE(0.1573)            | 0.328 (0.459)        | 0.561 (0.217)        | 0.727 (0.181)        |                       |
| BE(0.05)              | 0.179 (0.246)        | 0.312 (0.223)        | 0.933 (0.083)        |                       |
| BE(0.01)              | 0.117 (0.173)        | 0.089 (0.143)        | <b>0.991</b> (0.032) |                       |
| ZINB-ORACLE           | 0.032 (0.046)        | 1 (0)                | 1 (0)                |                       |

Table 33: Simulation results with example 1,  $\rho = 0.8, \theta = 10, n = 100$ . Median and robust standard deviations (in parentheses) of the MSE ratio between the penalized model and full model, and the estimated  $\theta$ . Mean and standard deviations of sensitivity and specificity.

| Method                | MSE                  | Sensitivity          | Specificity          | $\hat{\theta}$         |
|-----------------------|----------------------|----------------------|----------------------|------------------------|
| <b>NB component</b>   |                      |                      |                      |                        |
| NB-LASSO              | 0.212 (0.173)        | 0.3 (0.369)          | 0.893 (0.105)        | 0.44 (0.191)           |
| NB-MCP                | 0.446 (0.361)        | 0.355 (0.357)        | 0.891 (0.078)        | 0.556 (0.173)          |
| NB-SCAD               | 0.455 (0.374)        | 0.345 (0.367)        | 0.869 (0.09)         | 0.555 (0.189)          |
| ZINB-LASSO            | <b>0.036</b> (0.035) | <b>0.67</b> (0.364)  | 0.9 (0.078)          | <b>16.309</b> (19.102) |
| ZINB-MCP              | 0.056 (0.064)        | 0.505 (0.366)        | <b>0.942</b> (0.063) | 27.176 (32.465)        |
| ZINB-SCAD             | 0.057 (0.068)        | 0.56 (0.364)         | 0.93 (0.068)         | 27.307 (34.062)        |
| BE(0.1573)            | 0.357 (0.402)        | 0.648 (0.32)         | 0.58 (0.211)         | 589869 (874529)        |
| BE(0.05)              | 0.135 (0.158)        | 0.572 (0.337)        | 0.767 (0.225)        | 161266 (239082)        |
| BE(0.01)              | 0.075 (0.082)        | 0.497 (0.347)        | 0.87 (0.227)         | 53.693 (70.808)        |
| ZINB-ORACLE           | 0.006 (0.006)        | 1 (0)                | 1 (0)                | 20.124 (20.541)        |
| <b>Zero component</b> |                      |                      |                      |                        |
| ZINB-LASSO            | <b>3e-05</b> (4e-05) | 0.208 (0.201)        | <b>0.948</b> (0.045) |                        |
| ZINB-MCP              | 0.00019 (0.00027)    | 0.365 (0.237)        | 0.872 (0.098)        |                        |
| ZINB-SCAD             | 8e-05 (0.00011)      | 0.225 (0.218)        | 0.944 (0.058)        |                        |
| BE(0.1573)            | 0.00534 (0.0079)     | <b>0.461</b> (0.286) | 0.609 (0.228)        |                        |
| BE(0.05)              | 0.00079 (0.00117)    | 0.276 (0.257)        | 0.813 (0.234)        |                        |
| BE(0.01)              | 1e-04 (0.00015)      | 0.161 (0.242)        | 0.914 (0.227)        |                        |
| ZINB-ORACLE           | 2e-05 (3e-05)        | 1 (0)                | 1 (0)                |                        |

Table 34: Simulation results with example 2,  $\rho = 0.8, \theta = 10, n = 100$ . Median and robust standard deviations (in parentheses) of the MSE ratio between the penalized model and full model, and the estimated  $\theta$ . Mean and standard deviations of sensitivity and specificity.

| Method                | MSE                  | Sensitivity          | Specificity          | $\hat{\theta}$         |
|-----------------------|----------------------|----------------------|----------------------|------------------------|
| <b>NB component</b>   |                      |                      |                      |                        |
| NB-LASSO              | 0.228 (0.141)        | 0.722 (0.361)        | 0.861 (0.09)         | 2.139 (1.018)          |
| NB-MCP                | 0.424 (0.32)         | 0.557 (0.353)        | 0.915 (0.074)        | 2.249 (1.045)          |
| NB-SCAD               | 0.391 (0.284)        | 0.562 (0.355)        | 0.897 (0.084)        | 2.254 (1.123)          |
| ZINB-LASSO            | <b>0.089</b> (0.083) | <b>0.851</b> (0.272) | 0.888 (0.079)        | 17.243 (14.158)        |
| ZINB-MCP              | 0.112 (0.131)        | 0.67 (0.345)         | <b>0.955</b> (0.061) | <b>13.141</b> (12.641) |
| ZINB-SCAD             | 0.132 (0.166)        | 0.711 (0.321)        | 0.942 (0.058)        | 15.831 (13.283)        |
| BE(0.1573)            | 0.757 (0.392)        | 0.696 (0.291)        | 0.613 (0.198)        | 129721 (192312)        |
| BE(0.05)              | 0.455 (0.381)        | 0.597 (0.328)        | 0.797 (0.195)        | 105 (147)              |
| BE(0.01)              | 0.309 (0.3)          | 0.538 (0.347)        | 0.89 (0.19)          | 19.645 (20.253)        |
| ZINB-ORACLE           | 0.016 (0.017)        | 1 (0)                | 1 (0)                | 15.948 (14.846)        |
| <b>Zero component</b> |                      |                      |                      |                        |
| ZINB-LASSO            | <b>3e-05</b> (2e-05) | 0.186 (0.205)        | <b>0.944</b> (0.059) |                        |
| ZINB-MCP              | 0.0093 (0.01377)     | <b>0.503</b> (0.278) | 0.664 (0.266)        |                        |
| ZINB-SCAD             | 0.00011 (0.00014)    | 0.198 (0.201)        | 0.934 (0.079)        |                        |
| BE(0.1573)            | 0.00131 (0.00186)    | 0.427 (0.256)        | 0.626 (0.215)        |                        |
| BE(0.05)              | 0.00015 (0.00021)    | 0.263 (0.236)        | 0.838 (0.203)        |                        |
| BE(0.01)              | 4e-05 (5e-05)        | 0.118 (0.189)        | 0.937 (0.191)        |                        |
| ZINB-ORACLE           | 3e-05 (4e-05)        | 1 (0)                | 1 (0)                |                        |

Table 35: Simulation results with example 3,  $\rho = 0.8, \theta = 10, n = 100$ . Median and robust standard deviations (in parentheses) of the MSE ratio between the penalized model and full model, and the estimated  $\theta$ . Mean and standard deviations of sensitivity and specificity.

| Method                | MSE                  | Sensitivity          | Specificity          | $\hat{\theta}$         |
|-----------------------|----------------------|----------------------|----------------------|------------------------|
| <b>NB component</b>   |                      |                      |                      |                        |
| NB-LASSO              | 0.242 (0.167)        | 0.495 (0.399)        | 0.874 (0.097)        | 0.864 (0.326)          |
| NB-MCP                | 0.497 (0.331)        | 0.387 (0.335)        | 0.893 (0.077)        | 0.967 (0.276)          |
| NB-SCAD               | 0.538 (0.342)        | 0.428 (0.361)        | 0.871 (0.083)        | 0.979 (0.313)          |
| ZINB-LASSO            | <b>0.057</b> (0.051) | <b>0.747</b> (0.324) | 0.898 (0.085)        | 16.794 (15.28)         |
| ZINB-MCP              | 0.096 (0.088)        | 0.577 (0.341)        | <b>0.938</b> (0.07)  | 24.51 (25.774)         |
| ZINB-SCAD             | 0.102 (0.11)         | 0.644 (0.353)        | 0.925 (0.084)        | 24.902 (25.673)        |
| BE(0.1573)            | 0.364 (0.341)        | 0.66 (0.289)         | 0.65 (0.146)         | 19763 (29291)          |
| BE(0.05)              | 0.246 (0.214)        | 0.54 (0.313)         | 0.832 (0.121)        | 37.979 (45.314)        |
| BE(0.01)              | 0.147 (0.155)        | 0.434 (0.317)        | 0.924 (0.082)        | <b>16.591</b> (14.889) |
| ZINB-ORACLE           | 0.009 (0.009)        | 1 (0)                | 1 (0)                | 18.359 (17.251)        |
| <b>Zero component</b> |                      |                      |                      |                        |
| ZINB-LASSO            | <b>4e-05</b> (6e-05) | 0.273 (0.204)        | 0.938 (0.062)        |                        |
| ZINB-MCP              | 3e-04 (0.00043)      | 0.374 (0.237)        | 0.869 (0.113)        |                        |
| ZINB-SCAD             | 0.00014 (2e-04)      | 0.237 (0.205)        | 0.95 (0.053)         |                        |
| BE(0.1573)            | 0.00283 (0.00416)    | <b>0.443</b> (0.233) | 0.649 (0.183)        |                        |
| BE(0.05)              | 0.00056 (0.00082)    | 0.245 (0.2)          | 0.869 (0.124)        |                        |
| BE(0.01)              | 0.00012 (0.00016)    | 0.114 (0.134)        | <b>0.973</b> (0.041) |                        |
| ZINB-ORACLE           | 4e-05 (6e-05)        | 1 (0)                | 1 (0)                |                        |

Table 36: Simulation results with example 4,  $\rho = 0.8, \theta = 10, n = 100$ . Median and robust standard deviations (in parentheses) of the MSE ratio between the penalized model and full model, and the estimated  $\theta$ . Mean and standard deviations of sensitivity and specificity.

| Method                | MSE                  | Sensitivity          | Specificity          | $\hat{\theta}$       |
|-----------------------|----------------------|----------------------|----------------------|----------------------|
| <b>NB component</b>   |                      |                      |                      |                      |
| NB-LASSO              | 0.596 (0.362)        | 0.107 (0.141)        | <b>0.952</b> (0.066) | 0.903 (0.236)        |
| NB-MCP                | 0.804 (0.572)        | 0.197 (0.182)        | 0.933 (0.07)         | 1.085 (0.276)        |
| NB-SCAD               | 0.79 (0.604)         | 0.169 (0.184)        | 0.933 (0.078)        | 1.036 (0.323)        |
| ZINB-LASSO            | <b>0.468</b> (0.253) | 0.222 (0.234)        | 0.91 (0.107)         | 6.018 (3.823)        |
| ZINB-MCP              | 0.53 (0.262)         | 0.27 (0.228)         | 0.906 (0.102)        | <b>9.616</b> (6.265) |
| ZINB-SCAD             | 0.562 (0.3)          | 0.349 (0.222)        | 0.879 (0.102)        | 11.539 (7.574)       |
| BE(0.1573)            | 0.838 (0.367)        | <b>0.657</b> (0.242) | 0.65 (0.146)         | 74.347 (92.371)      |
| BE(0.05)              | 0.607 (0.407)        | 0.525 (0.29)         | 0.825 (0.122)        | 22.75 (19.008)       |
| BE(0.01)              | 0.556 (0.356)        | 0.41 (0.294)         | 0.913 (0.088)        | 13.614 (8.564)       |
| ZINB-ORACLE           | 0.087 (0.067)        | 1 (0)                | 1 (0)                | 15.051 (9.463)       |
| <b>Zero component</b> |                      |                      |                      |                      |
| ZINB-LASSO            | <b>0.022</b> (0.029) | 0.107 (0.132)        | 0.965 (0.05)         |                      |
| ZINB-MCP              | 0.112 (0.136)        | 0.347 (0.228)        | 0.728 (0.178)        |                      |
| ZINB-SCAD             | 0.05 (0.068)         | 0.169 (0.154)        | 0.909 (0.095)        |                      |
| BE(0.1573)            | 0.284 (0.368)        | <b>0.409</b> (0.241) | 0.695 (0.168)        |                      |
| BE(0.05)              | 0.104 (0.132)        | 0.21 (0.195)         | 0.879 (0.109)        |                      |
| BE(0.01)              | 0.044 (0.055)        | 0.095 (0.135)        | <b>0.975</b> (0.041) |                      |
| ZINB-ORACLE           | 0.022 (0.033)        | 1 (0)                | 1 (0)                |                      |

Table 37: Simulation results with example 5,  $\rho = 0.8, \theta = 10, n = 100$ . Median and robust standard deviations (in parentheses) of the MSE ratio between the penalized model and full model, and the estimated  $\theta$ . Mean and standard deviations of sensitivity and specificity.

| Method                | MSE                  | Sensitivity          | Specificity          | $\hat{\theta}$        |
|-----------------------|----------------------|----------------------|----------------------|-----------------------|
| <b>NB component</b>   |                      |                      |                      |                       |
| NB-LASSO              | 0.762 (0.644)        | 0.802 (0.312)        | 0.871 (0.099)        | 1.271 (0.521)         |
| NB-MCP                | 0.758 (0.816)        | 0.74 (0.332)         | 0.924 (0.066)        | 1.396 (0.445)         |
| NB-SCAD               | 0.771 (0.804)        | 0.766 (0.307)        | 0.895 (0.084)        | 1.425 (0.489)         |
| ZINB-LASSO            | 0.208 (0.186)        | <b>0.958</b> (0.173) | 0.909 (0.078)        | <b>14.113</b> (8.669) |
| ZINB-MCP              | 0.144 (0.147)        | 0.917 (0.214)        | <b>0.966</b> (0.047) | 15.297 (9.06)         |
| ZINB-SCAD             | 0.122 (0.136)        | 0.938 (0.181)        | 0.954 (0.064)        | 15.253 (9.21)         |
| BE(0.1573)            | 0.681 (0.232)        | 0.949 (0.173)        | 0.675 (0.148)        | 53.846 (62.814)       |
| BE(0.05)              | 0.291 (0.308)        | 0.936 (0.187)        | 0.859 (0.128)        | 25.546 (23.342)       |
| BE(0.01)              | <b>0.105</b> (0.118) | 0.91 (0.209)         | 0.965 (0.054)        | 14.568 (8.236)        |
| ZINB-ORACLE           | 0.043 (0.043)        | 1 (0)                | 1 (0)                | 13.862 (6.641)        |
| <b>Zero component</b> |                      |                      |                      |                       |
| ZINB-LASSO            | <b>0.041</b> (0.06)  | 0.362 (0.243)        | 0.932 (0.062)        |                       |
| ZINB-MCP              | 0.112 (0.142)        | <b>0.583</b> (0.242) | 0.773 (0.173)        |                       |
| ZINB-SCAD             | 0.088 (0.108)        | 0.336 (0.256)        | 0.95 (0.057)         |                       |
| BE(0.1573)            | 0.467 (0.288)        | 0.519 (0.241)        | 0.666 (0.183)        |                       |
| BE(0.05)              | 0.143 (0.129)        | 0.298 (0.235)        | 0.901 (0.105)        |                       |
| BE(0.01)              | 0.1 (0.098)          | 0.154 (0.186)        | <b>0.977</b> (0.04)  |                       |
| ZINB-ORACLE           | 0.026 (0.038)        | 1 (0)                | 1 (0)                |                       |
